# Supplementary material for: The co‐existence of multiple oak leaf flushes contributes to the large within‐tree variation in chemistry, insect attack and pathogen infection
Source: PubMed Central journal article supplement (PMC9545873; doi:10.1111/nph.18209), 2022-05-26
Supplement: NPH-235-1615-s001.pdf [file NPH-235-1615-s001.pdf]

**The co-existence of multiple oak leaf flushes contributes to the large within-tree variation in chemistry, insect attack and pathogen infection**

Álvaro Gaytán, Xoaquín Moreira, Bastien Castagneyrol, Inge Van Halder, Pieter De Frenne, Camille Meeussen, Bart G.H. Timmermans, Jan P.J.G. Ten Hoopen, Pil U. Rasmussen, Nick Bos, Raimo Jaatinen, Pertti Pulkkinen, Sara Söderlund, Felisa Covelo, Karl Gotthard and Ayco J.M. Tack

Acceptance date: 3 May 2022

**SUPPORTING INFORMATION**

**Table S1.** Differences between the first and the second oak leaf flush (*Quercus robur*) in the concentration of primary (nitrogen, phosphorus) and secondary compounds (flavonoids, hydroxycinnamic acids, condensed tannins and hydrolysable tannins) during the early, mid and late season. Shown are  $\chi^2$  values, degrees of freedom and p-values from linear mixed effect models, with significant p-values ( $p < 0.05$ ) in bold.

| <b>Response variable</b> | <b>Predictor</b>           | <b><math>\chi^2</math></b> | <b>df</b> | <b>p</b>        |
|--------------------------|----------------------------|----------------------------|-----------|-----------------|
| Nitrogen                 | Leaf flush                 | 2454.81                    | 1         | <b>&lt;0.01</b> |
|                          | Season                     | 1128.95                    | 2         | <b>&lt;0.01</b> |
|                          | Leaf flush $\times$ Season | 131.61                     | 2         | <b>&lt;0.01</b> |
| Phosphorus               | Leaf flush                 | 306.02                     | 1         | <b>&lt;0.01</b> |
|                          | Season                     | 2331.29                    | 2         | <b>&lt;0.01</b> |
|                          | Leaf flush $\times$ Season | 210.46                     | 2         | <b>&lt;0.01</b> |
| Flavonoids               | Leaf flush                 | 1616.96                    | 1         | <b>&lt;0.01</b> |
|                          | Season                     | 1615.63                    | 2         | <b>&lt;0.01</b> |
|                          | Leaf flush $\times$ Season | 653.78                     | 2         | <b>&lt;0.01</b> |
| Hydroxycinnamic acids    | Leaf flush                 | 392.40                     | 1         | <b>&lt;0.01</b> |
|                          | Season                     | 1165.19                    | 2         | <b>&lt;0.01</b> |
|                          | Leaf flush $\times$ Season | 34.54                      | 2         | <b>&lt;0.01</b> |
| Condensed tannins        | Leaf flush                 | 2239.21                    | 1         | <b>&lt;0.01</b> |
|                          | Season                     | 170.10                     | 2         | <b>&lt;0.01</b> |
|                          | Leaf flush $\times$ Season | 506.86                     | 2         | <b>&lt;0.01</b> |
| Hydrolysable tannins     | Leaf flush                 | 2411.10                    | 1         | <b>&lt;0.01</b> |
|                          | Season                     | 793.58                     | 2         | <b>&lt;0.01</b> |
|                          | Leaf flush $\times$ Season | 1136.94                    | 2         | <b>&lt;0.01</b> |

**Table S2.** Differences between the first and the second oak leaf flush (*Quercus robur*) in insect attack (percentage of free-feeding herbivory, proportion of leaves with leaf mines, proportion of leaves with galls) and pathogen infection (percentage of infection by powdery mildew on upper and lower leaf side) during the early, mid and late season. Shown are  $\chi^2$  values, degrees of freedom and p-values from linear mixed effect models, with significant p-values ( $p < 0.05$ ) in bold.

| <b>Response variable</b>                           | <b>Predictor</b>           | <b><math>\chi^2</math></b> | <b>df</b> | <b>p</b>        |
|----------------------------------------------------|----------------------------|----------------------------|-----------|-----------------|
| Herbivory (%)                                      | Leaf flush                 | 227.57                     | 1         | <b>&lt;0.01</b> |
|                                                    | Season                     | 130.39                     | 2         | <b>&lt;0.01</b> |
|                                                    | Leaf flush $\times$ Season | 4.17                       | 2         | 0.12            |
| Proportion of leaves with leaf mines               | Leaf flush                 | 73.71                      | 1         | <b>&lt;0.01</b> |
|                                                    | Season                     | 67.61                      | 2         | <b>&lt;0.01</b> |
|                                                    | Leaf flush $\times$ Season | 1.87                       | 2         | 0.39            |
| Proportion of leaves with galls                    | Leaf flush                 | 24.48                      | 1         | <b>&lt;0.01</b> |
|                                                    | Season                     | 21.42                      | 2         | <b>&lt;0.01</b> |
|                                                    | Leaf flush $\times$ Season | 5.13                       | 2         | 0.08            |
| Infection by powdery mildew on upper leaf side (%) | Leaf flush                 | 3453.22                    | 1         | <b>&lt;0.01</b> |
|                                                    | Season                     | 767.45                     | 2         | <b>&lt;0.01</b> |
|                                                    | Leaf flush $\times$ Season | 95.61                      | 2         | <b>&lt;0.01</b> |
| Infection by powdery mildew on lower leaf side (%) | Leaf flush                 | 809.22                     | 1         | <b>&lt;0.01</b> |
|                                                    | Season                     | 1006.55                    | 2         | <b>&lt;0.01</b> |
|                                                    | Leaf flush $\times$ Season | 418.15                     | 2         | <b>&lt;0.01</b> |

**Table S3.** The effect of season, nitrogen, phosphorus and their interactions on the percentage of herbivory, separately for the first and second oak leaf flush (*Quercus robur*). Shown are  $\chi^2$  values, degrees of freedom and p-values from linear mixed effect models, with significant p-values ( $p < 0.05$ ) in bold.

| <b>Response variable</b>      | <b>Predictor</b>           | <b><math>\chi^2</math></b> | <b>df</b> | <b>p</b>        |
|-------------------------------|----------------------------|----------------------------|-----------|-----------------|
| Herbivory (%)<br>First flush  | Season                     | 125.97                     | 2         | <b>&lt;0.01</b> |
|                               | Nitrogen                   | 24.46                      | 1         | <b>&lt;0.01</b> |
|                               | Phosphorus                 | 0.07                       | 1         | 0.80            |
|                               | Season $\times$ Nitrogen   | 23.66                      | 2         | <b>&lt;0.01</b> |
|                               | Season $\times$ Phosphorus | 40.89                      | 2         | <b>&lt;0.01</b> |
| Herbivory (%)<br>Second flush | Season                     | 86.18                      | 2         | <b>&lt;0.01</b> |
|                               | Nitrogen                   | 9.91                       | 1         | <b>&lt;0.01</b> |
|                               | Phosphorus                 | 10.27                      | 1         | <b>&lt;0.01</b> |
|                               | Season $\times$ Nitrogen   | 186.69                     | 2         | <b>&lt;0.01</b> |
|                               | Season $\times$ Phosphorus | 132.43                     | 2         | <b>&lt;0.01</b> |

**Table S4.** The effect of season, flavonoids, hydroxycinnamic acids, condensed tannins, hydrolysable tannins and their interactions on the percentage of herbivory, separately for the first and second oak leaf flush (*Quercus robur*). Shown are  $\chi^2$  values, degrees of freedom and p-values from linear mixed effect models, with significant p-values ( $p < 0.05$ ) in bold.

| <b>Response variable</b>      | <b>Predictor</b>                      | <b><math>\chi^2</math></b> | <b>df</b> | <b>p</b>        |
|-------------------------------|---------------------------------------|----------------------------|-----------|-----------------|
| Herbivory (%)<br>First flush  | Season                                | 107.37                     | 2         | <b>&lt;0.01</b> |
|                               | Flavonoids                            | 0.12                       | 1         | 0.72            |
|                               | Hydroxycinnamic acids                 | 0.16                       | 1         | 0.69            |
|                               | Condensed tannins                     | 4.51                       | 1         | <b>0.03</b>     |
|                               | Hydrolysable tannins                  | 1.07                       | 1         | 0.30            |
|                               | Season $\times$ Flavonoids            | 15.80                      | 2         | <b>&lt;0.01</b> |
|                               | Season $\times$ Hydroxycinnamic acids | 13.21                      | 2         | <b>&lt;0.01</b> |
|                               | Season $\times$ Condensed tannins     | 38.91                      | 2         | <b>&lt;0.01</b> |
|                               | Season $\times$ Hydrolysable tannins  | 17.09                      | 2         | <b>&lt;0.01</b> |
| Herbivory (%)<br>Second flush | Season                                | 64.40                      | 2         | <b>&lt;0.01</b> |
|                               | Flavonoids                            | 266.50                     | 1         | <b>&lt;0.01</b> |
|                               | Hydroxycinnamic acids                 | 6.18                       | 1         | <b>&lt;0.01</b> |
|                               | Condensed tannins                     | 4.03                       | 1         | <b>0.045</b>    |
|                               | Hydrolysable tannins                  | 8.04                       | 1         | <b>&lt;0.01</b> |
|                               | Season $\times$ Flavonoids            | 486.54                     | 2         | <b>&lt;0.01</b> |
|                               | Season $\times$ Hydroxycinnamic acids | 14.59                      | 2         | <b>&lt;0.01</b> |
|                               | Season $\times$ Condensed tannins     | 12.39                      | 2         | <b>&lt;0.01</b> |
|                               | Season $\times$ Hydrolysable tannins  | 117.64                     | 2         | <b>&lt;0.01</b> |

**Table S5.** The effect of season, nitrogen, phosphorus and their interactions on the proportion of leaves with leaf mines separately for the first and the second oak leaf flush (*Quercus robur*). Shown are  $\chi^2$  values, degrees of freedom and p-values from linear mixed effect models, with significant p-values ( $p < 0.05$ ) in bold.

| <b>Response variable</b>                             | <b>Predictor</b>           | <b><math>\chi^2</math></b> | <b>df</b> | <b>p</b>        |
|------------------------------------------------------|----------------------------|----------------------------|-----------|-----------------|
| Proportion of leaves with leaf mines<br>First flush  | Season                     | 283.28                     | 2         | <b>&lt;0.01</b> |
|                                                      | Nitrogen                   | 14.65                      | 1         | <b>&lt;0.01</b> |
|                                                      | Phosphorus                 | 8.93                       | 1         | <b>&lt;0.01</b> |
|                                                      | Season $\times$ Nitrogen   | 2.53                       | 2         | 0.28            |
|                                                      | Season $\times$ Phosphorus | 6.90                       | 2         | <b>0.03</b>     |
| Proportion of leaves with leaf mines<br>Second flush | Season                     | 38.10                      | 2         | <b>&lt;0.01</b> |
|                                                      | Nitrogen                   | 8.62                       | 1         | <b>0.03</b>     |
|                                                      | Phosphorus                 | 1.33                       | 1         | 0.25            |
|                                                      | Season $\times$ Nitrogen   | 2.56                       | 2         | 0.28            |
|                                                      | Season $\times$ Phosphorus | 2.71                       | 2         | 0.26            |

**Table S6.** The effect of season, flavonoids, hydroxycinnamic acids, condensed tannins, hydrolysable tannins and their interactions on the proportion of leaves separately for the first and the second oak leaf flush (*Quercus robur*). Shown are  $\chi^2$  values, degrees of freedom and p-values from linear mixed effect models, with significant p-values ( $p < 0.05$ ) in bold.

| <b>Response variable</b>                             | <b>Predictor</b>                      | <b><math>\chi^2</math></b> | <b>df</b> | <b>p</b>        |
|------------------------------------------------------|---------------------------------------|----------------------------|-----------|-----------------|
| Proportion of leaves with leaf mines<br>First flush  | Season                                | 223.11                     | 2         | <b>&lt;0.01</b> |
|                                                      | Flavonoids                            | 0.47                       | 1         | 0.50            |
|                                                      | Hydroxycinnamic acids                 | 0.12                       | 1         | 0.73            |
|                                                      | Condensed tannins                     | 11.19                      | 1         | <b>&lt;0.01</b> |
|                                                      | Hydrolysable tannins                  | 2.44                       | 1         | 0.12            |
|                                                      | Season $\times$ Flavonoids            | 35.49                      | 2         | <b>&lt;0.01</b> |
|                                                      | Season $\times$ Hydroxycinnamic acids | 0.94                       | 2         | 0.626           |
|                                                      | Season $\times$ Condensed tannins     | 10.36                      | 2         | <b>&lt;0.01</b> |
|                                                      | Season $\times$ Hydrolysable tannins  | 16.10                      | 2         | <b>&lt;0.01</b> |
| Proportion of leaves with leaf mines<br>Second flush | Season                                | 28.46                      | 2         | <b>&lt;0.01</b> |
|                                                      | Flavonoids                            | 2.13                       | 1         | 0.15            |
|                                                      | Hydroxycinnamic acids                 | 6.22                       | 1         | <b>0.01</b>     |
|                                                      | Condensed tannins                     | 22.74                      | 1         | <b>&lt;0.01</b> |
|                                                      | Hydrolysable tannins                  | 15.31                      | 1         | <b>&lt;0.01</b> |
|                                                      | Season $\times$ Flavonoids            | 29.86                      | 2         | <b>&lt;0.01</b> |
|                                                      | Season $\times$ Hydroxycinnamic acids | 2.51                       | 2         | 0.29            |
|                                                      | Season $\times$ Condensed tannins     | 11.24                      | 2         | <b>&lt;0.01</b> |
|                                                      | Season $\times$ Hydrolysable tannins  | 17.12                      | 2         | <b>&lt;0.01</b> |

**Table S7.** The effect of season, nitrogen, phosphorus and their interactions on the proportion of leaves with galls separately for the first and the second oak leaf flush (*Quercus robur*). Shown are  $\chi^2$  values, degrees of freedom and p-values from linear mixed effect models, with significant p-values ( $p < 0.05$ ) in bold.

| <b>Response variable</b>                        | <b>Predictor</b>           | <b><math>\chi^2</math></b> | <b>df</b> | <b>p</b>        |
|-------------------------------------------------|----------------------------|----------------------------|-----------|-----------------|
| Proportion of leaves with galls<br>First flush  | Season                     | 108.34                     | 2         | <b>&lt;0.01</b> |
|                                                 | Nitrogen                   | 0.03                       | 1         | 0.87            |
|                                                 | Phosphorus                 | 7.91                       | 1         | <b>&lt;0.01</b> |
|                                                 | Season $\times$ Nitrogen   | 1.10                       | 2         | 0.58            |
|                                                 | Season $\times$ Phosphorus | 5.06                       | 2         | 0.08            |
| Proportion of leaves with galls<br>Second flush | Season                     | 25.36                      | 2         | <b>&lt;0.01</b> |
|                                                 | Nitrogen                   | 0.37                       | 1         | 0.54            |
|                                                 | Phosphorus                 | 0.18                       | 1         | 0.67            |
|                                                 | Season $\times$ Nitrogen   | 1.29                       | 2         | 0.52            |
|                                                 | Season $\times$ Phosphorus | 1.19                       | 2         | 0.55            |



**Table S8.** The effect of season, flavonoids, hydroxycinnamic acids, condensed tannins, hydrolysable tannins and their interactions on the proportion of leaves separately for the first and the second oak leaf flush (*Quercus robur*). Shown are  $\chi^2$  values, degrees of freedom and p-values from linear mixed effect models, with significant p-values ( $p < 0.05$ ) in bold.

| <b>Response variable</b>                        | <b>Predictor</b>                      | <b><math>\chi^2</math></b> | <b>df</b> | <b>p</b>        |
|-------------------------------------------------|---------------------------------------|----------------------------|-----------|-----------------|
| Proportion of leaves with galls<br>First flush  | Season                                | 104.67                     | 2         | <b>&lt;0.01</b> |
|                                                 | Flavonoids                            | 0.15                       | 1         | 0.70            |
|                                                 | Hydroxycinnamic acids                 | 0.18                       | 1         | 0.67            |
|                                                 | Condensed tannins                     | 1.30                       | 1         | 0.26            |
|                                                 | Hydrolysable tannins                  | 3.45                       | 1         | 0.06            |
|                                                 | Season $\times$ Flavonoids            | 11.42                      | 2         | <b>&lt;0.01</b> |
|                                                 | Season $\times$ Hydroxycinnamic acids | 1.40                       | 2         | 0.50            |
|                                                 | Season $\times$ Condensed tannins     | 27.76                      | 2         | <b>&lt;0.01</b> |
|                                                 | Season $\times$ Hydrolysable tannins  | 1.27                       | 2         | 0.53            |
| Proportion of leaves with galls<br>Second flush | Season                                | 16.38                      | 2         | <b>&lt;0.01</b> |
|                                                 | Flavonoids                            | 3.46                       | 1         | 0.06            |
|                                                 | Hydroxycinnamic acids                 | 4.96                       | 1         | <b>0.03</b>     |
|                                                 | Condensed tannins                     | 0.04                       | 1         | 0.84            |
|                                                 | Hydrolysable tannins                  | 0.38                       | 1         | 0.54            |
|                                                 | Season $\times$ Flavonoids            | 8.32                       | 2         | <b>0.02</b>     |
|                                                 | Season $\times$ Hydroxycinnamic acids | 2.69                       | 2         | 0.26            |
|                                                 | Season $\times$ Condensed tannins     | 22.31                      | 2         | <b>&lt;0.01</b> |
|                                                 | Season $\times$ Hydrolysable tannins  | 0.02                       | 2         | 0.99            |

**Table S9.** The effect of seasons, nitrogen, phosphorus and their interactions on the percentage of infection by oak powdery mildew on upper leaf side separately for the first and the second oak leaf flush (*Quercus robur*). Shown are  $\chi^2$  values, degrees of freedom and p-values from linear mixed effect models, with significant p-values ( $p < 0.05$ ) in bold.

| <b>Response variable</b>                                               | <b>Predictor</b>           | <b><math>\chi^2</math></b> | <b>df</b> | <b>p</b>        |
|------------------------------------------------------------------------|----------------------------|----------------------------|-----------|-----------------|
| Infection by oak powdery mildew on upper leaf side (%)<br>First flush  | Season                     | 735.64                     | 2         | <b>&lt;0.01</b> |
|                                                                        | Nitrogen                   | 42.59                      | 1         | <b>&lt;0.01</b> |
|                                                                        | Phosphorus                 | 31.97                      | 1         | <b>&lt;0.01</b> |
|                                                                        | Season $\times$ Nitrogen   | 97.43                      | 2         | <b>&lt;0.01</b> |
|                                                                        | Season $\times$ Phosphorus | 130.29                     | 2         | <b>&lt;0.01</b> |
| Infection by oak powdery mildew on upper leaf side (%)<br>Second flush | Season                     | 198.23                     | 2         | <b>&lt;0.01</b> |
|                                                                        | Nitrogen                   | 33.07                      | 1         | <b>&lt;0.01</b> |
|                                                                        | Phosphorus                 | 23.55                      | 1         | <b>&lt;0.01</b> |
|                                                                        | Season $\times$ Nitrogen   | 213.38                     | 2         | <b>&lt;0.01</b> |
|                                                                        | Season $\times$ Phosphorus | 227.04                     | 2         | <b>&lt;0.01</b> |

**Table S10.** The effect of season, flavonoids, hydroxycinnamic acids, condensed tannins, hydrolysable tannins and their interactions on the percentage of infection by oak powdery mildew on upper leaf side separately for the first and the second oak leaf flush (*Quercus robur*). Shown are  $\chi^2$  values, degrees of freedom and p-values from linear mixed effect models, with significant p-values ( $p < 0.05$ ) in bold.

| <b>Response variable</b>                                               | <b>Predictor</b>                      | <b><math>\chi^2</math></b> | <b>df</b> | <b>p</b>        |
|------------------------------------------------------------------------|---------------------------------------|----------------------------|-----------|-----------------|
| Infection by oak powdery mildew on upper leaf side (%)<br>First flush  | Season                                | 604.03                     | 2         | <b>&lt;0.01</b> |
|                                                                        | Flavonoids                            | 8.80                       | 1         | <b>&lt;0.01</b> |
|                                                                        | Hydroxycinnamic acids                 | 0.18                       | 1         | 0.67            |
|                                                                        | Condensed tannins                     | 0.18                       | 1         | 0.67            |
|                                                                        | Hydrolysable tannins                  | 0.54                       | 1         | 0.46            |
|                                                                        | Season $\times$ Flavonoids            | 139.33                     | 2         | <b>&lt;0.01</b> |
|                                                                        | Season $\times$ Hydroxycinnamic acids | 112.60                     | 2         | <b>&lt;0.01</b> |
|                                                                        | Season $\times$ Condensed tannins     | 31.98                      | 2         | <b>&lt;0.01</b> |
|                                                                        | Season $\times$ Hydrolysable tannins  | 36.04                      | 2         | <b>&lt;0.01</b> |
| Infection by oak powdery mildew on upper leaf side (%)<br>Second flush | Season                                | 370.02                     | 2         | <b>&lt;0.01</b> |
|                                                                        | Flavonoids                            | 2.72                       | 1         | 0.10            |
|                                                                        | Hydroxycinnamic acids                 | 79.31                      | 1         | <b>&lt;0.01</b> |
|                                                                        | Condensed tannins                     | 104.84                     | 1         | <b>&lt;0.01</b> |
|                                                                        | Hydrolysable tannins                  | 100.32                     | 1         | <b>&lt;0.01</b> |
|                                                                        | Season $\times$ Flavonoids            | 115.18                     | 2         | <b>&lt;0.01</b> |
|                                                                        | Season $\times$ Hydroxycinnamic acids | 28.62                      | 2         | <b>&lt;0.01</b> |
|                                                                        | Season $\times$ Condensed tannins     | 23.14                      | 2         | <b>&lt;0.01</b> |
|                                                                        | Season $\times$ Hydrolysable tannins  | 148.40                     | 2         | <b>&lt;0.01</b> |

**Table S11.** The effect of seasons, nitrogen, phosphorus and their interactions on the percentage of infection by oak powdery mildew on lower leaf side separately for the first and the second oak leaf flush (*Quercus robur*). Shown are  $\chi^2$  values, degrees of freedom and p-values from linear mixed effect models, with significant p-values ( $p < 0.05$ ) in bold.

| <b>Response variable</b>                                               | <b>Predictor</b>           | <b><math>\chi^2</math></b> | <b>df</b> | <b>p</b>        |
|------------------------------------------------------------------------|----------------------------|----------------------------|-----------|-----------------|
| Infection by oak powdery mildew on lower leaf side (%)<br>First flush  | Season                     | 519.27                     | 2         | <b>&lt;0.01</b> |
|                                                                        | Nitrogen                   | 17.46                      | 1         | <b>&lt;0.01</b> |
|                                                                        | Phosphorus                 | 8.48                       | 1         | <b>&lt;0.01</b> |
|                                                                        | Season $\times$ Nitrogen   | 53.56                      | 2         | <b>&lt;0.01</b> |
|                                                                        | Season $\times$ Phosphorus | 15.39                      | 2         | <b>&lt;0.01</b> |
| Infection by oak powdery mildew on lower leaf side (%)<br>Second flush | Season                     | 656.92                     | 2         | <b>&lt;0.01</b> |
|                                                                        | Nitrogen                   | 28.71                      | 1         | <b>&lt;0.01</b> |
|                                                                        | Phosphorus                 | 97.40                      | 1         | <b>&lt;0.01</b> |
|                                                                        | Season $\times$ Nitrogen   | 190.97                     | 2         | <b>&lt;0.01</b> |
|                                                                        | Season $\times$ Phosphorus | 545.62                     | 2         | <b>&lt;0.01</b> |

**Table S12.** The effect of seasons, flavonoids, hydroxycinnamic acids, condensed tannins, hydrolysable tannins and their interactions on the percentage of infection by oak powdery mildew on lower leaf side separately for the first and the second oak leaf flush (*Quercus robur*). Shown are  $\chi^2$  values, degrees of freedom and p-values from linear mixed effect models, with significant p-values ( $p < 0.05$ ) in bold.

| <b>Response variable</b>                                               | <b>Predictor</b>                      | <b><math>\chi^2</math></b> | <b>df</b> | <b>p</b>        |
|------------------------------------------------------------------------|---------------------------------------|----------------------------|-----------|-----------------|
| Infection by oak powdery mildew on lower leaf side (%)<br>First flush  | Season                                | 535.08                     | 2         | <b>&lt;0.01</b> |
|                                                                        | Flavonoids                            | 1.75                       | 1         | 0.19            |
|                                                                        | Hydroxycinnamic acids                 | 1.79                       | 1         | 0.18            |
|                                                                        | Condensed tannins                     | 11.71                      | 1         | <b>&lt;0.01</b> |
|                                                                        | Hydrolysable tannins                  | 0.96                       | 1         | 0.33            |
|                                                                        | Season $\times$ Flavonoids            | 13.10                      | 2         | <b>&lt;0.01</b> |
|                                                                        | Season $\times$ Hydroxycinnamic acids | 6.34                       | 2         | <b>0.042</b>    |
|                                                                        | Season $\times$ Condensed tannins     | 33.00                      | 2         | <b>&lt;0.01</b> |
|                                                                        | Season $\times$ Hydrolysable tannins  | 20.22                      | 2         | <b>&lt;0.01</b> |
| Infection by oak powdery mildew on lower leaf side (%)<br>Second flush | Season                                | 148.70                     | 2         | <b>&lt;0.01</b> |
|                                                                        | Flavonoids                            | 180.64                     | 1         | <b>&lt;0.01</b> |
|                                                                        | Hydroxycinnamic acids                 | 2.15                       | 1         | 0.14            |
|                                                                        | Condensed tannins                     | 12.34                      | 1         | <b>&lt;0.01</b> |
|                                                                        | Hydrolysable tannins                  | 80.43                      | 1         | <b>&lt;0.01</b> |
|                                                                        | Season $\times$ Flavonoids            | 476.92                     | 2         | <b>&lt;0.01</b> |
|                                                                        | Season $\times$ Hydroxycinnamic acids | 36.34                      | 2         | <b>&lt;0.01</b> |
|                                                                        | Season $\times$ Condensed tannins     | 22.93                      | 2         | <b>&lt;0.01</b> |
|                                                                        | Season $\times$ Hydrolysable tannins  | 36.86                      | 2         | <b>&lt;0.01</b> |

**Table S13.** The effect of nitrogen, phosphorus and their interactions on the percentage of herbivory separately for the early, mid and late season in oak leaves (*Quercus robur*). Shown are  $\chi^2$  values, degrees of freedom and p-values from linear mixed effect models, with significant p-values ( $p < 0.05$ ) in bold.

| <b>Response variable</b>      | <b>Predictor</b>               | <b><math>\chi^2</math></b> | <b>df</b> | <b>p</b>        |
|-------------------------------|--------------------------------|----------------------------|-----------|-----------------|
| Herbivory (%)<br>Early season | Leaf flush                     | 27.92                      | 1         | <b>&lt;0.01</b> |
|                               | Nitrogen                       | 4.04                       | 1         | <b>0.045</b>    |
|                               | Phosphorus                     | <.01                       | 1         | 0.99            |
|                               | Leaf flush $\times$ Nitrogen   | <.01                       | 1         | 0.92            |
|                               | Leaf flush $\times$ Phosphorus | 1.19                       | 1         | 0.28            |
| Herbivory (%)<br>Mid season   | Leaf flush                     | 60.86                      | 2         | <b>&lt;0.01</b> |
|                               | Nitrogen                       | 25.80                      | 1         | <b>&lt;0.01</b> |
|                               | Phosphorus                     | 14.93                      | 1         | <b>&lt;0.01</b> |
|                               | Leaf flush $\times$ Nitrogen   | 26.00                      | 2         | <b>&lt;0.01</b> |
|                               | Leaf flush $\times$ Phosphorus | 168.89                     | 2         | <b>&lt;0.01</b> |
| Herbivory (%)<br>Late season  | Leaf flush                     | 72.18                      | 2         | <b>&lt;0.01</b> |
|                               | Nitrogen                       | 2.38                       | 1         | 0.12            |
|                               | Phosphorus                     | 47.58                      | 1         | <b>&lt;0.01</b> |
|                               | Leaf flush $\times$ Nitrogen   | 33.23                      | 2         | <b>&lt;0.01</b> |
|                               | Leaf flush $\times$ Phosphorus | 15.77                      | 2         | <b>&lt;0.01</b> |

**Table S14.** The effect of oak leaf flush (*Quercus robur*), flavonoids, hydroxycinnamic acids, condensed tannins, hydrolysable tannins and their interactions on the percentage of herbivory separately for the early, mid and late season. Shown are  $\chi^2$  values, degrees of freedom and p-values from linear mixed effect models, with significant p-values ( $p < 0.05$ ) in bold.

| <b>Response variable</b>      | <b>Predictor</b>                          | <b><math>\chi^2</math></b> | <b>df</b> | <b>p</b>        |
|-------------------------------|-------------------------------------------|----------------------------|-----------|-----------------|
| Herbivory (%)<br>Early season | Leaf flush                                | 1.11                       | 1         | 0.29            |
|                               | Flavonoids                                | 9.82                       | 1         | <b>&lt;0.01</b> |
|                               | Hydroxycinnamic acids                     | 0.11                       | 1         | 0.74            |
|                               | Condensed tannins                         | 9.76                       | 1         | <b>&lt;0.01</b> |
|                               | Hydrolysable tannins                      | 3.38                       | 1         | 0.07            |
|                               | Leaf flush $\times$ Flavonoids            | 8.20                       | 1         | <b>&lt;0.01</b> |
|                               | Leaf flush $\times$ Hydroxycinnamic acids | 1.11                       | 1         | 0.29            |
|                               | Leaf flush $\times$ Condensed tannins     | 2.29                       | 1         | 0.13            |
|                               | Leaf flush $\times$ Hydrolysable tannins  | 4.19                       | 1         | <b>0.04</b>     |
| Herbivory (%)<br>Mid season   | Leaf flush                                | 33.03                      | 2         | <b>&lt;0.01</b> |
|                               | Flavonoids                                | 0.13                       | 1         | 0.71            |
|                               | Hydroxycinnamic acids                     | <.01                       | 1         | 0.98            |
|                               | Condensed tannins                         | 3.83                       | 1         | <b>0.05</b>     |
|                               | Hydrolysable tannins                      | 0.84                       | 1         | 0.36            |
|                               | Leaf flush $\times$ Flavonoids            | 14.95                      | 2         | <b>&lt;0.01</b> |
|                               | Leaf flush $\times$ Hydroxycinnamic acids | 10.90                      | 2         | <b>&lt;0.01</b> |
|                               | Leaf flush $\times$ Condensed tannins     | 0.21                       | 2         | 0.65            |
|                               | Leaf flush $\times$ Hydrolysable tannins  | 15.72                      | 2         | <b>&lt;0.01</b> |
| Herbivory (%)<br>Late season  | Leaf flush                                | 145.06                     | 2         | <b>&lt;0.01</b> |
|                               | Flavonoids                                | <.01                       | 1         | 0.94            |
|                               | Hydroxycinnamic acids                     | 2.06                       | 1         | 0.15            |
|                               | Condensed tannins                         | 1.33                       | 1         | 0.25            |
|                               | Hydrolysable tannins                      | 0.16                       | 1         | 0.69            |
|                               | Leaf flush $\times$ Flavonoids            | 17.87                      | 2         | <b>&lt;0.01</b> |
|                               | Leaf flush $\times$ Hydroxycinnamic acids | 14.70                      | 2         | <b>&lt;0.01</b> |
|                               | Leaf flush $\times$ Condensed tannins     | 47.59                      | 2         | <b>&lt;0.01</b> |
|                               | Leaf flush $\times$ Hydrolysable tannins  | 16.50                      | 2         | <b>&lt;0.01</b> |

**Table S15.** The effect of nitrogen, phosphorus and their interactions on the proportion of leaves with leaf mines separately for the early, mid and late season in oak leaves (*Quercus robur*). Shown are  $\chi^2$  values, degrees of freedom and p-values from linear mixed effect models, with significant p-values ( $p < 0.05$ ) in bold.

| <b>Response variable</b>                             | <b>Predictor</b>               | <b><math>\chi^2</math></b> | <b>df</b> | <b>p</b>        |
|------------------------------------------------------|--------------------------------|----------------------------|-----------|-----------------|
| Proportion of leaves with leaf mines<br>Early season | Leaf flush                     | 0.79                       | 1         | 0.38            |
|                                                      | Nitrogen                       | 0.50                       | 1         | 0.48            |
|                                                      | Phosphorus                     | 0.76                       | 1         | 0.38            |
|                                                      | Leaf flush $\times$ Nitrogen   | 0.04                       | 1         | 0.84            |
|                                                      | Leaf flush $\times$ Phosphorus | 0.34                       | 1         | 0.56            |
| Proportion of leaves with leaf mines<br>Mid season   | Leaf flush                     | 245.30                     | 2         | <b>&lt;0.01</b> |
|                                                      | Nitrogen                       | 32.91                      | 1         | <b>&lt;0.01</b> |
|                                                      | Phosphorus                     | 2.55                       | 1         | 0.11            |
|                                                      | Leaf flush $\times$ Nitrogen   | 3.39                       | 2         | 0.18            |
|                                                      | Leaf flush $\times$ Phosphorus | 13.76                      | 2         | <b>&lt;0.01</b> |
| Proportion of leaves with leaf mines<br>Late season  | Leaf flush                     | 119.48                     | 2         | <b>&lt;0.01</b> |
|                                                      | Nitrogen                       | 0.86                       | 1         | 0.35            |
|                                                      | Phosphorus                     | 0.87                       | 1         | 0.35            |
|                                                      | Leaf flush $\times$ Nitrogen   | 1.95                       | 2         | 0.38            |
|                                                      | Leaf flush $\times$ Phosphorus | 9.60                       | 2         | <b>&lt;0.01</b> |



**Table S16.** The effect of oak leaf flush (*Quercus robur*), flavonoids, hydroxycinnamic acids, condensed tannins, hydrolysable tannins and their interactions on the proportion of leaves with leaf mines separately for the early, mid and late season. Shown are  $\chi^2$  values, degrees of freedom and p-values from linear mixed effect models, with significant p-values ( $p < 0.05$ ) in bold.

| <b>Response variable</b>                             | <b>Predictor</b>                          | <b><math>\chi^2</math></b> | <b>df</b> | <b>p</b>        |
|------------------------------------------------------|-------------------------------------------|----------------------------|-----------|-----------------|
| Proportion of leaves with leaf mines<br>Early season | Leaf flush                                | 0.50                       | 1         | 0.48            |
|                                                      | Flavonoids                                | <.01                       | 1         | 0.99            |
|                                                      | Hydroxycinnamic acids                     | <.01                       | 1         | 0.96            |
|                                                      | Condensed tannins                         | 0.27                       | 1         | 0.61            |
|                                                      | Hydrolysable tannins                      | 0.12                       | 1         | 0.73            |
|                                                      | Leaf flush $\times$ Flavonoids            | 2.66                       | 1         | 0.10            |
|                                                      | Leaf flush $\times$ Hydroxycinnamic acids | 0.59                       | 1         | 0.44            |
|                                                      | Leaf flush $\times$ Condensed tannins     | 0.47                       | 1         | 0.50            |
|                                                      | Leaf flush $\times$ Hydrolysable tannins  | <.01                       | 1         | 0.96            |
| Proportion of leaves with leaf mines<br>Mid season   | Leaf flush                                | 269.19                     | 2         | <b>&lt;0.01</b> |
|                                                      | Flavonoids                                | 0.940                      | 1         | 0.33            |
|                                                      | Hydroxycinnamic acids                     | 0.162                      | 1         | 0.69            |
|                                                      | Condensed tannins                         | 8.623                      | 1         | <b>&lt;0.01</b> |
|                                                      | Hydrolysable tannins                      | 0.537                      | 1         | 0.46            |
|                                                      | Leaf flush $\times$ Flavonoids            | 37.58                      | 2         | <b>&lt;0.01</b> |
|                                                      | Leaf flush $\times$ Hydroxycinnamic acids | 2.55                       | 2         | 0.28            |
|                                                      | Leaf flush $\times$ Condensed tannins     | 3.17                       | 2         | 0.08            |
|                                                      | Leaf flush $\times$ Hydrolysable tannins  | 16.04                      | 2         | <b>&lt;0.01</b> |
| Proportion of leaves with leaf mines<br>Late season  | Leaf flush                                | 173.07                     | 2         | <b>&lt;0.01</b> |
|                                                      | Flavonoids                                | 4.30                       | 1         | <b>0.04</b>     |
|                                                      | Hydroxycinnamic acids                     | 2.38                       | 1         | 0.12            |
|                                                      | Condensed tannins                         | 3.18                       | 1         | 0.08            |
|                                                      | Hydrolysable tannins                      | <.01                       | 1         | 0.94            |
|                                                      | Leaf flush $\times$ Flavonoids            | 12.20                      | 2         | <b>&lt;0.01</b> |
|                                                      | Leaf flush $\times$ Hydroxycinnamic acids | 4.37                       | 2         | 0.11            |
|                                                      | Leaf flush $\times$ Condensed tannins     | 5.32                       | 2         | 0.07            |
|                                                      | Leaf flush $\times$ Hydrolysable tannins  | 4.11                       | 2         | 0.13            |

**Table S17.** The effect of nitrogen, phosphorus and their interactions on the proportion of leaves with galls separately for the early, mid and late season in oak leaves (*Quercus robur*). Shown are  $\chi^2$  values, degrees of freedom and p-values from linear mixed effect models, with significant p-values ( $p < 0.05$ ) in bold.

| <b>Response variable</b>                            | <b>Predictor</b>               | <b><math>\chi^2</math></b> | <b>df</b> | <b>p</b>        |
|-----------------------------------------------------|--------------------------------|----------------------------|-----------|-----------------|
| Proportion of leaves with galls<br>Early season     | Leaf flush                     | 1.14                       | 1         | 0.29            |
|                                                     | Nitrogen                       | 4.34                       | 1         | <b>0.04</b>     |
|                                                     | Phosphorus                     | 8.53                       | 1         | <b>&lt;0.01</b> |
|                                                     | Leaf flush $\times$ Nitrogen   | 0.89                       | 1         | 0.35            |
|                                                     | Leaf flush $\times$ Phosphorus | 7.63                       | 1         | <b>&lt;0.01</b> |
| Proportion of leaves with galls<br>Mid season       | Leaf flush                     | 123.66                     | 2         | <b>&lt;0.01</b> |
|                                                     | Nitrogen                       | 6.17                       | 1         | <b>0.01</b>     |
|                                                     | Phosphorus                     | 7.42                       | 1         | <b>&lt;0.01</b> |
|                                                     | Leaf flush $\times$ Nitrogen   | 5.53                       | 2         | 0.06            |
|                                                     | Leaf flush $\times$ Phosphorus | 0.29                       | 2         | 0.86            |
| Proportion of leaves with leaf galls<br>Late season | Leaf flush                     | 16.69                      | 2         | <b>&lt;0.01</b> |
|                                                     | Nitrogen                       | 3.94                       | 1         | <b>0.047</b>    |
|                                                     | Phosphorus                     | 0.01                       | 1         | 0.92            |
|                                                     | Leaf flush $\times$ Nitrogen   | 1.82                       | 2         | 0.40            |
|                                                     | Leaf flush $\times$ Phosphorus | 1.66                       | 2         | 0.44            |

**Table S18.** The effect of oak leaf flush (*Quercus robur*), flavonoids, hydroxycinnamic acids, condensed tannins, hydrolysable tannins and their interactions on the proportion of leaves with galls separately for the early, mid and late season. Shown are  $\chi^2$  values, degrees of freedom and p-values from linear mixed effect models, with significant p-values ( $p < 0.05$ ) in bold.

| <b>Response variable</b>                        | <b>Predictor</b>                          | <b><math>\chi^2</math></b> | <b>df</b> | <b>p</b>        |
|-------------------------------------------------|-------------------------------------------|----------------------------|-----------|-----------------|
| Proportion of leaves with galls<br>Early season | Leaf flush                                | 0.75                       | 1         | 0.39            |
|                                                 | Flavonoids                                | 1.57                       | 1         | 0.21            |
|                                                 | Hydroxycinnamic acids                     | 1.54                       | 1         | 0.22            |
|                                                 | Condensed tannins                         | 1.40                       | 1         | 0.24            |
|                                                 | Hydrolysable tannins                      | 0.43                       | 1         | 0.51            |
|                                                 | Leaf flush $\times$ Flavonoids            | 7.52                       | 1         | <b>&lt;0.01</b> |
|                                                 | Leaf flush $\times$ Hydroxycinnamic acids | 1.68                       | 1         | 0.20            |
|                                                 | Leaf flush $\times$ Condensed tannins     | 0.27                       | 1         | 0.61            |
|                                                 | Leaf flush $\times$ Hydrolysable tannins  | 8.36                       | 1         | <b>&lt;0.01</b> |
| Proportion of leaves with galls<br>Mid season   | Leaf flush                                | 21.98                      | 2         | <b>&lt;0.01</b> |
|                                                 | Flavonoids                                | 19.81                      | 1         | <b>&lt;0.01</b> |
|                                                 | Hydroxycinnamic acids                     | 0.01                       | 1         | 0.91            |
|                                                 | Condensed tannins                         | 37.11                      | 1         | <b>&lt;0.01</b> |
|                                                 | Hydrolysable tannins                      | 0.27                       | 1         | 0.61            |
|                                                 | Leaf flush $\times$ Flavonoids            | 46.48                      | 2         | <b>&lt;0.01</b> |
|                                                 | Leaf flush $\times$ Hydroxycinnamic acids | 16.12                      | 2         | <b>&lt;0.01</b> |
|                                                 | Leaf flush $\times$ Condensed tannins     | 0.90                       | 2         | 0.34            |
|                                                 | Leaf flush $\times$ Hydrolysable tannins  | 9.38                       | 2         | <b>&lt;0.01</b> |
| Proportion of leaves with galls<br>Late season  | Leaf flush                                | 53.82                      | 2         | <b>&lt;0.01</b> |
|                                                 | Flavonoids                                | 0.32                       | 1         | 0.57            |
|                                                 | Hydroxycinnamic acids                     | 0.06                       | 1         | 0.81            |
|                                                 | Condensed tannins                         | 3.67                       | 1         | 0.06            |
|                                                 | Hydrolysable tannins                      | 0.28                       | 1         | 0.60            |
|                                                 | Leaf flush $\times$ Flavonoids            | 2.94                       | 2         | 0.23            |
|                                                 | Leaf flush $\times$ Hydroxycinnamic acids | 5.16                       | 2         | 0.08            |
|                                                 | Leaf flush $\times$ Condensed tannins     | 1.08                       | 2         | 0.58            |
|                                                 | Leaf flush $\times$ Hydrolysable tannins  | 3.58                       | 2         | 0.17            |

**Table S19.** The effect of nitrogen, phosphorus and their interactions on the percentage of infection by oak powdery mildew on upper leaf separately for the early, mid and late season in oak leaves (*Quercus robur*). Shown are  $\chi^2$  values, degrees of freedom and p-values from linear mixed effect models, with significant p-values ( $p < 0.05$ ) in bold.

| <b>Response variable</b>                                               | <b>Predictor</b>               | <b><math>\chi^2</math></b> | <b>df</b> | <b>p</b>        |
|------------------------------------------------------------------------|--------------------------------|----------------------------|-----------|-----------------|
| Infection by oak powdery mildew on upper leaf side (%)<br>Early season | Leaf flush                     | 1778.97                    | 1         | <b>&lt;0.01</b> |
|                                                                        | Nitrogen                       | 23.71                      | 1         | <b>&lt;0.01</b> |
|                                                                        | Phosphorus                     | 23.81                      | 1         | <b>&lt;0.01</b> |
|                                                                        | Leaf flush $\times$ Nitrogen   | 42.78                      | 1         | <b>&lt;0.01</b> |
|                                                                        | Leaf flush $\times$ Phosphorus | 30.45                      | 1         | <b>&lt;0.01</b> |
| Infection by oak powdery mildew on upper leaf side (%)<br>Mid season   | Leaf flush                     | 450.72                     | 2         | <b>&lt;0.01</b> |
|                                                                        | Nitrogen                       | 88.03                      | 1         | <b>&lt;0.01</b> |
|                                                                        | Phosphorus                     | 14.96                      | 1         | <b>&lt;0.01</b> |
|                                                                        | Leaf flush $\times$ Nitrogen   | 61.87                      | 2         | <b>&lt;0.01</b> |
|                                                                        | Leaf flush $\times$ Phosphorus | 78.82                      | 2         | <b>&lt;0.01</b> |
| Infection by oak powdery mildew on upper leaf side (%)<br>Late season  | Leaf flush                     | 118.53                     | 2         | <b>&lt;0.01</b> |
|                                                                        | Nitrogen                       | 102.85                     | 1         | <b>&lt;0.01</b> |
|                                                                        | Phosphorus                     | 777.96                     | 1         | <b>&lt;0.01</b> |
|                                                                        | Leaf flush $\times$ Nitrogen   | 1.14                       | 2         | 0.57            |
|                                                                        | Leaf flush $\times$ Phosphorus | 323.63                     | 2         | <b>&lt;0.01</b> |

**Table S20.** The effect of oak leaf flush (*Quercus robur*), flavonoids, hydroxycinnamic acids, condensed tannins, hydrolysable tannins and their interactions on the percentage of infection by oak powdery mildew on upper leaf side separately for the early, mid and late season. Shown are  $\chi^2$  values, degrees of freedom and p-values from linear mixed effect models, with significant p-values ( $p < 0.05$ ) in bold.

| <b>Response variable</b>                                               | <b>Predictor</b>                          | <b><math>\chi^2</math></b> | <b>df</b> | <b>p</b>        |
|------------------------------------------------------------------------|-------------------------------------------|----------------------------|-----------|-----------------|
| Infection by oak powdery mildew on upper leaf side (%)<br>Early season | Leaf flush                                | 138.32                     | 1         | <b>&lt;0.01</b> |
|                                                                        | Flavonoids                                | 41.88                      | 1         | <b>&lt;0.01</b> |
|                                                                        | Hydroxycinnamic acids                     | 79.93                      | 1         | <b>&lt;0.01</b> |
|                                                                        | Condensed tannins                         | 0.26                       | 1         | 0.61            |
|                                                                        | Hydrolysable tannins                      | 5.07                       | 1         | <b>0.02</b>     |
|                                                                        | Leaf flush $\times$ Flavonoids            | 121.17                     | 1         | <b>&lt;0.01</b> |
|                                                                        | Leaf flush $\times$ Hydroxycinnamic acids | 2.73                       | 1         | 0.10            |
|                                                                        | Leaf flush $\times$ Condensed tannins     | 7.28                       | 1         | <b>0.01</b>     |
|                                                                        | Leaf flush $\times$ Hydrolysable tannins  | 13.80                      | 1         | <b>&lt;0.01</b> |
| Infection by oak powdery mildew on upper leaf side (%)<br>Mid season   | Leaf flush                                | 859.85                     | 2         | <b>&lt;0.01</b> |
|                                                                        | Flavonoids                                | 0.28                       | 1         | 0.60            |
|                                                                        | Hydroxycinnamic acids                     | 23.23                      | 1         | <b>&lt;0.01</b> |
|                                                                        | Condensed tannins                         | 62.24                      | 1         | <b>&lt;0.01</b> |
|                                                                        | Hydrolysable tannins                      | 86.65                      | 1         | <b>&lt;0.01</b> |
|                                                                        | Leaf flush $\times$ Flavonoids            | 44.96                      | 2         | <b>&lt;0.01</b> |
|                                                                        | Leaf flush $\times$ Hydroxycinnamic acids | 51.54                      | 2         | <b>&lt;0.01</b> |
|                                                                        | Leaf flush $\times$ Condensed tannins     | <.01                       | 2         | 0.93            |
|                                                                        | Leaf flush $\times$ Hydrolysable tannins  | 0.68                       | 2         | 0.41            |
| Infection by oak powdery mildew on upper leaf side (%)<br>Late season  | Leaf flush                                | 1834.36                    | 2         | <b>&lt;0.01</b> |
|                                                                        | Flavonoids                                | 6.05                       | 1         | <b>0.01</b>     |
|                                                                        | Hydroxycinnamic acids                     | 60.16                      | 1         | <b>&lt;0.01</b> |
|                                                                        | Condensed tannins                         | 95.37                      | 1         | <b>&lt;0.01</b> |
|                                                                        | Hydrolysable tannins                      | 21.80                      | 1         | <b>&lt;0.01</b> |
|                                                                        | Leaf flush $\times$ Flavonoids            | 95.85                      | 2         | <b>&lt;0.01</b> |
|                                                                        | Leaf flush $\times$ Hydroxycinnamic acids | 69.41                      | 2         | <b>&lt;0.01</b> |
|                                                                        | Leaf flush $\times$ Condensed tannins     | 25.36                      | 2         | <b>&lt;0.01</b> |
|                                                                        | Leaf flush $\times$ Hydrolysable tannins  | 472.94                     | 2         | <b>&lt;0.01</b> |

**Table S21.** The effect of nitrogen, phosphorus and their interactions on the percentage of infection by oak powdery mildew on lower leaf side separately for the early, mid and late season in oak leaves (*Quercus robur*). Shown are  $\chi^2$  values, degrees of freedom and p-values from linear mixed effect models, with significant p-values ( $p < 0.05$ ) in bold.

| <b>Response variable</b>                                               | <b>Predictor</b>               | <b><math>\chi^2</math></b> | <b>df</b> | <b>p</b>        |
|------------------------------------------------------------------------|--------------------------------|----------------------------|-----------|-----------------|
| Infection by oak powdery mildew on lower leaf side (%)<br>Early season | Leaf flush                     | 2.67                       | 1         | 0.10            |
|                                                                        | Nitrogen                       | 6.57                       | 1         | <b>0.01</b>     |
|                                                                        | Phosphorus                     | 1.24                       | 1         | 0.27            |
|                                                                        | Leaf flush $\times$ Nitrogen   | 61.73                      | 1         | <b>&lt;0.01</b> |
|                                                                        | Leaf flush $\times$ Phosphorus | 10.15                      | 1         | <b>&lt;0.01</b> |
| Infection by oak powdery mildew on lower leaf side (%)<br>Mid season   | Leaf flush                     | 264.46                     | 2         | <b>&lt;0.01</b> |
|                                                                        | Nitrogen                       | 23.36                      | 1         | <b>&lt;0.01</b> |
|                                                                        | Phosphorus                     | 31.35                      | 1         | <b>&lt;0.01</b> |
|                                                                        | Leaf flush $\times$ Nitrogen   | 13.65                      | 2         | <b>&lt;0.01</b> |
|                                                                        | Leaf flush $\times$ Phosphorus | 4.72                       | 2         | 0.09            |
| Infection by oak powdery mildew on lower leaf side (%)<br>Late season  | Leaf flush                     | 36.75                      | 2         | <b>&lt;0.01</b> |
|                                                                        | Nitrogen                       | 7.74                       | 1         | <b>&lt;0.05</b> |
|                                                                        | Phosphorus                     | 935.84                     | 1         | <b>&lt;0.01</b> |
|                                                                        | Leaf flush $\times$ Nitrogen   | 137.92                     | 2         | <b>&lt;0.01</b> |
|                                                                        | Leaf flush $\times$ Phosphorus | 319.88                     | 2         | <b>&lt;0.01</b> |

**Table S22.** The effect of oak leaf flush (*Quercus robur*), flavonoids, hydroxycinnamic acids, condensed tannins, hydrolysable tannins and their interactions on the percentage of infection by oak powdery mildew on lower leaf side separately for the early, mid and late season. Shown are  $\chi^2$  values, degrees of freedom and p-values from linear mixed effect models, with significant p-values ( $p < 0.05$ ) in bold.

| <b>Response variable</b>                                               | <b>Predictor</b>                          | <b><math>\chi^2</math></b> | <b>df</b> | <b>p</b>        |
|------------------------------------------------------------------------|-------------------------------------------|----------------------------|-----------|-----------------|
| Infection by oak powdery mildew on lower leaf side (%)<br>Early season | Leaf flush                                | 20.02                      | 1         | <b>&lt;0.01</b> |
|                                                                        | Flavonoids                                | 47.18                      | 1         | <b>&lt;0.01</b> |
|                                                                        | Hydroxycinnamic acids                     | 1.20                       | 1         | 0.27            |
|                                                                        | Condensed tannins                         | 9.90                       | 1         | <b>&lt;0.01</b> |
|                                                                        | Hydrolysable tannins                      | 0.08                       | 1         | 0.78            |
|                                                                        | Leaf flush $\times$ Flavonoids            | 19.24                      | 1         | <b>&lt;0.01</b> |
|                                                                        | Leaf flush $\times$ Hydroxycinnamic acids | 1.21                       | 1         | 0.27            |
|                                                                        | Leaf flush $\times$ Condensed tannins     | 46.57                      | 1         | <b>&lt;0.01</b> |
|                                                                        | Leaf flush $\times$ Hydrolysable tannins  | 3.51                       | 1         | 0.06            |
| Infection by oak powdery mildew on lower leaf side (%)<br>Mid season   | Leaf flush                                | 581.66                     | 2         | <b>&lt;0.01</b> |
|                                                                        | Flavonoids                                | 56.46                      | 1         | <b>&lt;0.01</b> |
|                                                                        | Hydroxycinnamic acids                     | 5.85                       | 1         | <b>0.02</b>     |
|                                                                        | Condensed tannins                         | 4.39                       | 1         | <b>0.04</b>     |
|                                                                        | Hydrolysable tannins                      | 3.27                       | 1         | 0.07            |
|                                                                        | Leaf flush $\times$ Flavonoids            | 57.12                      | 2         | <b>&lt;0.01</b> |
|                                                                        | Leaf flush $\times$ Hydroxycinnamic acids | 34.84                      | 2         | <b>&lt;0.01</b> |
|                                                                        | Leaf flush $\times$ Condensed tannins     | 1.27                       | 2         | 0.26            |
|                                                                        | Leaf flush $\times$ Hydrolysable tannins  | 2.06                       | 2         | 0.15            |
| Infection by oak powdery mildew on lower leaf side (%)<br>Late season  | Leaf flush                                | 275.42                     | 2         | <b>&lt;0.01</b> |
|                                                                        | Flavonoids                                | 2.44                       | 1         | 0.12            |
|                                                                        | Hydroxycinnamic acids                     | 2.42                       | 1         | 0.12            |
|                                                                        | Condensed tannins                         | 109.18                     | 1         | <b>&lt;0.01</b> |
|                                                                        | Hydrolysable tannins                      | 16.13                      | 1         | <b>&lt;0.01</b> |
|                                                                        | Leaf flush $\times$ Flavonoids            | 582.01                     | 2         | <b>&lt;0.01</b> |
|                                                                        | Leaf flush $\times$ Hydroxycinnamic acids | 13.79                      | 2         | <b>&lt;0.01</b> |
|                                                                        | Leaf flush $\times$ Condensed tannins     | 93.92                      | 2         | <b>&lt;0.01</b> |
|                                                                        | Leaf flush $\times$ Hydrolysable tannins  | 221.60                     | 2         | <b>&lt;0.01</b> |

**Table S23.** The impact of latitude on the relative abundance of the first, second and third oak leaf flush (*Quercus robur*). To account for the hierarchical and repeated-measures design, we included country, population and tree identity as random intercepts. Shown are  $\chi^2$  values, degrees of freedom and p-values from a linear mixed effect model, with significant p-values ( $p < 0.05$ ) in bold.

| <b>Response variable</b> | <b>Predictor</b> | <b><math>\chi^2</math></b> | <b>df</b> | <b>p</b>        |
|--------------------------|------------------|----------------------------|-----------|-----------------|
| Leaf flush               | Latitude         | 16.52                      | 1         | <b>&lt;0.01</b> |
|                          | Season           | 15.70                      | 2         | <b>&lt;0.01</b> |



**Table S24.** Results of paired tests comparing the concentration of primary (nitrogen, phosphorus), secondary compounds (flavonoids, hydroxycinnamic acids, condensed tannins and hydrolysable tannins), insect attack (percentage of free-feeding herbivory (%), proportion of leaves with leaf mines, proportion of leaves with galls) and pathogen infection (percentage of infection by powdery mildew on upper and lower leaf side) among seasons in oak leaves (*Quercus robur*). Shown are the groups compared, estimates, standard errors (SE), t-ratios and p-values. Significant p-values ( $p < 0.05$ ) shown in bold.

| Response variable     | Flush  | Contrast     | Estimate | SE   | t-ratio | p                |
|-----------------------|--------|--------------|----------|------|---------|------------------|
| Nitrogen              | First  | Early – Mid  | 1.61     | 0.21 | 7.78    | <b>&lt;0.001</b> |
| Nitrogen              | First  | Early – Late | 6.57     | 0.21 | 31.83   | <b>&lt;0.001</b> |
| Nitrogen              | First  | Mid – Late   | 4.97     | 0.21 | 24.05   | <b>&lt;0.001</b> |
| Nitrogen              | Second | Early – Mid  | 2.57     | 0.22 | 11.78   | <b>&lt;0.001</b> |
| Nitrogen              | Second | Early – Late | 2.32     | 0.22 | 10.52   | <b>&lt;0.001</b> |
| Nitrogen              | Second | Mid – Late   | -0.25    | 0.17 | -1.45   | 0.314            |
| Nitrogen              | Third  | Mid – Late   | 4.62     | 0.58 | 7.99    | <b>&lt;0.001</b> |
| Phosphorus            | First  | Early – Mid  | 0.53     | 0.01 | 38.56   | <b>&lt;0.001</b> |
| Phosphorus            | First  | Early – Late | 0.21     | 0.01 | 15.03   | <b>&lt;0.001</b> |
| Phosphorus            | First  | Mid – Late   | -0.32    | 0.01 | -23.52  | <b>&lt;0.001</b> |
| Phosphorus            | Second | Early – Mid  | 0.65     | 0.01 | 50.43   | <b>&lt;0.001</b> |
| Phosphorus            | Second | Early – Late | 0.47     | 0.01 | 36.33   | <b>&lt;0.001</b> |
| Phosphorus            | Second | Mid – Late   | -0.18    | 0.01 | -17.64  | <b>&lt;0.001</b> |
| Phosphorus            | Third  | Mid – Late   | 0.71     | 0.03 | 21.62   | <b>&lt;0.001</b> |
| Flavonoids            | First  | Early – Mid  | -0.49    | 0.23 | -2.20   | 0.072            |
| Flavonoids            | First  | Early – Late | 4.97     | 0.23 | 22.12   | <b>&lt;0.001</b> |
| Flavonoids            | First  | Mid – Late   | 5.47     | 0.23 | 24.32   | <b>&lt;0.001</b> |
| Flavonoids            | Second | Early – Mid  | 6.92     | 0.60 | 11.62   | <b>&lt;0.001</b> |
| Flavonoids            | Second | Early – Late | 21.77    | 0.60 | 36.07   | <b>&lt;0.001</b> |
| Flavonoids            | Second | Mid – Late   | 14.85    | 0.46 | 32.25   | <b>&lt;0.001</b> |
| Flavonoids            | Third  | Mid – Late   | 24.4     | 0.86 | 28.56   | <b>&lt;0.001</b> |
| Hydroxycinnamic acids | First  | Early – Mid  | -0.18    | 0.08 | -2.30   | <b>&lt;0.001</b> |
| Hydroxycinnamic acids | First  | Early – Late | 2.20     | 0.08 | 28.44   | <b>&lt;0.001</b> |
| Hydroxycinnamic acids | First  | Mid – Late   | 2.38     | 0.08 | 30.74   | <b>&lt;0.001</b> |
| Hydroxycinnamic acids | Second | Early – Mid  | 1.21     | 0.14 | 8.69    | <b>&lt;0.001</b> |
| Hydroxycinnamic acids | Second | Early – Late | -0.12    | 0.14 | -0.88   | 0.656            |
| Hydroxycinnamic acids | Second | Mid – Late   | 1.33     | 0.11 | 12.52   | <b>&lt;0.001</b> |
| Hydroxycinnamic acids | Third  | Mid – Late   | 4.96     | 0.28 | 17.69   | <b>&lt;0.001</b> |
| Condensed tannins     | First  | Early – Mid  | -0.70    | 0.10 | -7.15   | <b>&lt;0.001</b> |
| Condensed tannins     | First  | Early – Late | -2.24    | 0.10 | -22.89  | <b>&lt;0.001</b> |
| Condensed tannins     | First  | Mid – Late   | -1.54    | 0.10 | -15.73  | <b>&lt;0.001</b> |
| Condensed tannins     | Second | Early – Mid  | -0.04    | 0.28 | -0.16   | 0.987            |
| Condensed tannins     | Second | Early – Late | 3.69     | 0.28 | 13.12   | <b>&lt;0.001</b> |
| Condensed tannins     | Second | Mid – Late   | 3.74     | 0.22 | 17.40   | <b>&lt;0.001</b> |
| Condensed tannins     | Third  | Mid – Late   | -0.48    | 0.27 | -1.73   | 0.085            |
| Hydrolysable tannins  | First  | Early – Mid  | -0.39    | 0.03 | -11.78  | <b>&lt;0.001</b> |
| Hydrolysable tannins  | First  | Early – Late | -0.02    | 0.03 | -0.48   | 0.880            |
| Hydrolysable tannins  | First  | Mid – Late   | 0.37     | 0.03 | 1.30    | 0.841            |
| Hydrolysable tannins  | Second | Early – Mid  | 1.05     | 0.10 | 10.06   | <b>&lt;0.001</b> |
| Hydrolysable tannins  | Second | Early – Late | 3.59     | 0.11 | 34.10   | <b>&lt;0.001</b> |
| Hydrolysable tannins  | Second | Mid – Late   | 2.55     | 0.08 | 31.69   | <b>&lt;0.001</b> |
| Hydrolysable tannins  | Third  | Mid – Late   | 3.41     | 0.07 | 51.42   | <b>&lt;0.001</b> |
| Herbivory (%)         | First  | Early – Mid  | -1.73    | 0.31 | -5.51   | <b>&lt;0.001</b> |
| Herbivory (%)         | First  | Early – Late | -3.28    | 0.31 | -10.45  | <b>&lt;0.001</b> |
| Herbivory (%)         | First  | Mid – Late   | -1.55    | 0.32 | -4.93   | <b>&lt;0.001</b> |
| Herbivory (%)         | Second | Early – Mid  | -4.58    | 0.48 | -9.53   | <b>&lt;0.001</b> |
| Herbivory (%)         | Second | Early – Late | -5.29    | 0.49 | -10.86  | <b>&lt;0.001</b> |
| Herbivory (%)         | Second | Mid – Late   | -0.71    | 0.37 | -1.91   | 0.135            |
| Herbivory (%)         | Third  | Mid – Late   | -0.02    | 0.16 | -0.14   | 0.888            |

|                                                    |        |              |        |       |        |                |
|----------------------------------------------------|--------|--------------|--------|-------|--------|----------------|
| Proportion of leaves with leaf mines               | First  | Early – Mid  | -0.13  | 0.01  | -11.83 | < <b>0.001</b> |
| Proportion of leaves with leaf mines               | First  | Early – Late | -0.20  | 0.01  | -16.99 | < <b>0.001</b> |
| Proportion of leaves with leaf mines               | First  | Mid – Late   | -0.06  | 0.01  | -5.15  | < <b>0.001</b> |
| Proportion of leaves with leaf mines               | Second | Early – Mid  | -0.07  | 0.01  | -5.74  | < <b>0.001</b> |
| Proportion of leaves with leaf mines               | Second | Early – Late | -0.09  | 0.01  | -7.53  | < <b>0.001</b> |
| Proportion of leaves with leaf mines               | Second | Mid – Late   | -0.02  | 0.01  | -2.47  | <b>0.036</b>   |
| Proportion of leaves with leaf mines               | Third  | Mid – Late   | 0.02   | 0.01  | 1.27   | 0.218          |
| Proportion of leaves with galls                    | First  | Early – Mid  | -0.05  | 0.01  | -4.85  | < <b>0.001</b> |
| Proportion of leaves with galls                    | First  | Early – Late | -0.11  | 0.01  | -11.94 | < <b>0.001</b> |
| Proportion of leaves with galls                    | First  | Mid – Late   | -0.07  | 0.01  | -7.07  | < <b>0.001</b> |
| Proportion of leaves with galls                    | Second | Early – Mid  | -0.01  | 0.01  | -2.28  | 0.060          |
| Proportion of leaves with galls                    | Second | Early – Late | -0.03  | 0.01  | -4.91  | < <b>0.001</b> |
| Proportion of leaves with galls                    | Second | Mid – Late   | -0.02  | <0.01 | -3.55  | <b>0.001</b>   |
| Proportion of leaves with galls                    | Third  | Mid – Late   | <0.01  | 0.01  | -0.03  | 0.976          |
| Infection by powdery mildew on upper leaf side (%) | First  | Early – Mid  | -19.24 | 0.84  | -22.80 | < <b>0.001</b> |
| Infection by powdery mildew on upper leaf side (%) | First  | Early – Late | -13.37 | 0.84  | -15.84 | < <b>0.001</b> |
| Infection by powdery mildew on upper leaf side (%) | First  | Mid – Late   | 5.87   | 0.84  | 6.96   | < <b>0.001</b> |
| Infection by powdery mildew on upper leaf side (%) | Second | Early – Mid  | -15.26 | 1.14  | -13.39 | < <b>0.001</b> |
| Infection by powdery mildew on upper leaf side (%) | Second | Early – Late | -8.55  | 1.16  | -7.61  | < <b>0.001</b> |
| Infection by powdery mildew on upper leaf side (%) | Second | Mid – Late   | 6.70   | 0.88  | 7.61   | < <b>0.001</b> |
| Infection by powdery mildew on upper leaf side (%) | Third  | Mid – Late   | -15.90 | 4.68  | -3.40  | < <b>0.001</b> |
| Infection by powdery mildew on lower leaf side (%) | First  | Early – Mid  | -3.68  | 0.41  | -8.90  | < <b>0.001</b> |
| Infection by powdery mildew on lower leaf side (%) | First  | Early – Late | -10.58 | 0.41  | -25.57 | < <b>0.001</b> |
| Infection by powdery mildew on lower leaf side (%) | First  | Mid – Late   | -6.90  | 0.41  | -16.66 | < <b>0.001</b> |
| Infection by powdery mildew on lower leaf side (%) | Second | Early – Mid  | -11.30 | 1.57  | -7.19  | < <b>0.001</b> |
| Infection by powdery mildew on lower leaf side (%) | Second | Early – Late | -28.40 | 1.59  | -17.83 | < <b>0.001</b> |
| Infection by powdery mildew on lower leaf side (%) | Second | Mid – Late   | -17.10 | 1.21  | -14.09 | < <b>0.001</b> |
| Infection by powdery mildew on lower leaf side (%) | Third  | Mid – Late   | -28.8  | 2.65  | -10.88 | < <b>0.001</b> |

**Table S25.** Results of paired tests comparing the concentration of primary (nitrogen, phosphorus), secondary compounds (flavonoids, hydroxycinnamic acids, condensed tannins and hydrolysable tannins), insect attack (percentage of free-feeding herbivory (%), proportion of leaves with leaf mines, proportion of leaves with galls) and pathogen infection (percentage of infection by powdery mildew on upper and lower leaf side) among leaf flushes during the early, mid and late seasons in oak leaves (*Quercus robur*). Shown are the groups compared, estimates, standard errors (SE), t-ratios and p-values. Significant p-values ( $p < 0.05$ ) shown in bold.

| Response variable     | Season | Contrast       | Estimate | SE    | t-ratio | p                |
|-----------------------|--------|----------------|----------|-------|---------|------------------|
| Nitrogen              | Early  | First – Second | 6.97     | 0.11  | 61.34   | <b>&lt;0.001</b> |
| Nitrogen              | Mid    | First – Second | 10.64    | 0.19  | 57.44   | <b>&lt;0.001</b> |
| Nitrogen              | Mid    | First – Third  | 3.06     | 0.63  | 4.82    | <b>&lt;0.001</b> |
| Nitrogen              | Mid    | Second - Third | -7.58    | 0.63  | -11.95  | <b>&lt;0.001</b> |
| Nitrogen              | Late   | First – Second | 6.87     | 0.12  | 56.88   | <b>&lt;0.001</b> |
| Nitrogen              | Late   | First – Third  | -1.07    | 0.23  | -2.31   | <b>0.048</b>     |
| Nitrogen              | Late   | Second - Third | -6.94    | 0.23  | -29.80  | <b>&lt;0.001</b> |
| Phosphorus            | Early  | First – Second | -0.28    | 0.01  | -29.98  | <b>&lt;0.001</b> |
| Phosphorus            | Mid    | First – Second | 0.21     | <0.01 | 21.03   | <b>&lt;0.001</b> |
| Phosphorus            | Mid    | First – Third  | -0.57    | 0.03  | -16.80  | <b>&lt;0.001</b> |
| Phosphorus            | Mid    | Second - Third | -0.78    | 0.03  | -22.93  | <b>&lt;0.001</b> |
| Phosphorus            | Late   | First – Second | 0.47     | 0.01  | 61.27   | <b>&lt;0.001</b> |
| Phosphorus            | Late   | First – Third  | 0.16     | 0.01  | 10.88   | <b>&lt;0.001</b> |
| Phosphorus            | Late   | Second - Third | -0.31    | 0.02  | -21.22  | <b>&lt;0.001</b> |
| Flavonoids            | Early  | First – Second | -18.90   | 0.36  | -52.83  | <b>&lt;0.001</b> |
| Flavonoids            | Mid    | First – Second | -11.80   | 0.34  | -35.05  | <b>&lt;0.001</b> |
| Flavonoids            | Mid    | First – Third  | -23.80   | 1.16  | -20.63  | <b>&lt;0.001</b> |
| Flavonoids            | Mid    | Second - Third | -12.00   | 1.16  | -10.40  | <b>&lt;0.001</b> |
| Flavonoids            | Late   | First – Second | -2.60    | 0.24  | -10.91  | <b>&lt;0.001</b> |
| Flavonoids            | Late   | First – Third  | 1.24     | 0.45  | 2.78    | <b>0.015</b>     |
| Flavonoids            | Late   | Second - Third | 3.84     | 0.46  | 8.35    | <b>&lt;0.001</b> |
| Hydroxycinnamic acids | Early  | First – Second | 0.62     | 0.07  | 8.56    | <b>&lt;0.001</b> |
| Hydroxycinnamic acids | Mid    | First – Second | 1.62     | 0.09  | 18.71   | <b>&lt;0.001</b> |
| Hydroxycinnamic acids | Mid    | First – Third  | -2.03    | 0.30  | -6.86   | <b>&lt;0.001</b> |
| Hydroxycinnamic acids | Mid    | Second - Third | -3.65    | 0.30  | -12.32  | <b>&lt;0.001</b> |
| Hydroxycinnamic acids | Late   | First – Second | 0.60     | 0.05  | 12.09   | <b>&lt;0.001</b> |
| Hydroxycinnamic acids | Late   | First – Third  | 1.10     | 0.09  | 12.79   | <b>&lt;0.001</b> |
| Hydroxycinnamic acids | Late   | Second - Third | 0.50     | 0.09  | 5.62    | <b>&lt;0.001</b> |
| Condensed tannins     | Early  | First – Second | -5.39    | 0.14  | -38.38  | <b>&lt;0.001</b> |
| Condensed tannins     | Mid    | First – Second | -8.18    | 0.19  | -43.57  | <b>&lt;0.001</b> |
| Condensed tannins     | Mid    | First – Third  | -2.52    | 0.64  | -3.91   | <b>&lt;0.001</b> |
| Condensed tannins     | Mid    | Second - Third | 5.67     | 0.64  | 8.81    | <b>&lt;0.001</b> |
| Condensed tannins     | Late   | First – Second | -2.45    | 0.13  | -18.99  | <b>&lt;0.001</b> |
| Condensed tannins     | Late   | First – Third  | -0.28    | 0.24  | -1.16   | <b>&lt;0.001</b> |
| Condensed tannins     | Late   | Second - Third | 2.17     | 0.25  | 8.72    | <b>&lt;0.001</b> |
| Hydrolysable tannins  | Early  | First – Second | -4.08    | 0.05  | -86.78  | <b>&lt;0.001</b> |
| Hydrolysable tannins  | Mid    | First – Second | -2.61    | 0.07  | -37.87  | <b>&lt;0.001</b> |
| Hydrolysable tannins  | Mid    | First – Third  | -3.04    | 0.24  | -12.88  | <b>&lt;0.001</b> |
| Hydrolysable tannins  | Mid    | Second - Third | -0.43    | 0.24  | -1.83   | <b>&lt;0.001</b> |
| Hydrolysable tannins  | Late   | First – Second | -0.40    | 0.04  | -10.17  | <b>&lt;0.001</b> |
| Hydrolysable tannins  | Late   | First – Third  | 0.21     | 0.07  | 2.78    | <b>&lt;0.001</b> |
| Hydrolysable tannins  | Late   | Second - Third | 0.61     | 0.08  | 7.97    | <b>&lt;0.001</b> |
| Herbivory (%)         | Early  | First – Second | 2.48     | 0.36  | 6.94    | <b>&lt;0.001</b> |
| Herbivory (%)         | Mid    | First – Second | 3.55     | 0.38  | 9.10    | <b>&lt;0.001</b> |
| Herbivory (%)         | Mid    | First – Third  | 9.49     | 1.34  | 7.11    | <b>&lt;0.001</b> |
| Herbivory (%)         | Mid    | Second - Third | 5.95     | 1.34  | 4.45    | <b>&lt;0.001</b> |
| Herbivory (%)         | Late   | First – Second | 5.41     | 0.53  | 10.20   | <b>&lt;0.001</b> |
| Herbivory (%)         | Late   | First – Third  | 9.69     | 0.99  | 9.79    | <b>&lt;0.001</b> |
| Herbivory (%)         | Late   | Second - Third | 4.27     | 1.02  | 4.18    | <b>&lt;0.001</b> |

|                                                    |       |                |        |      |        |                |
|----------------------------------------------------|-------|----------------|--------|------|--------|----------------|
| Proportion of leaves with leaf mines               | Early | First – Second | 0.33   | 0.01 | 11.96  | < <b>0.001</b> |
| Proportion of leaves with leaf mines               | Mid   | First – Second | 0.22   | 0.01 | 16.61  | < <b>0.001</b> |
| Proportion of leaves with leaf mines               | Mid   | First – Third  | 0.21   | 0.04 | 4.82   | < <b>0.001</b> |
| Proportion of leaves with leaf mines               | Mid   | Second - Third | <0.01  | 0.04 | -0.04  | 0.999          |
| Proportion of leaves with leaf mines               | Late  | First – Second | 0.19   | 0.02 | 11.49  | < <b>0.001</b> |
| Proportion of leaves with leaf mines               | Late  | First – Third  | 0.24   | 0.03 | 8.01   | < <b>0.001</b> |
| Proportion of leaves with leaf mines               | Late  | Second - Third | 0.16   | 0.03 | 7.75   | <b>0.008</b>   |
| Proportion of leaves with galls                    | Early | First – Second | 0.03   | 0.01 | 2.25   | <b>0.025</b>   |
| Proportion of leaves with galls                    | Mid   | First – Second | 0.10   | 0.01 | 10.97  | < <b>0.001</b> |
| Proportion of leaves with galls                    | Mid   | First – Third  | 0.06   | 0.03 | 1.61   | <b>0.040</b>   |
| Proportion of leaves with galls                    | Mid   | Second - Third | -0.05  | 0.03 | -1.59  | <b>0.049</b>   |
| Proportion of leaves with galls                    | Late  | First – Second | 0.09   | 0.01 | 7.07   | < <b>0.001</b> |
| Proportion of leaves with galls                    | Late  | First – Third  | 0.08   | 0.02 | 3.29   | <b>0.003</b>   |
| Proportion of leaves with galls                    | Late  | Second - Third | -0.01  | 0.03 | -0.49  | 0.874          |
| Infection by powdery mildew on upper leaf side (%) | Early | First – Second | -28.60 | 1.30 | -22.07 | < <b>0.001</b> |
| Infection by powdery mildew on upper leaf side (%) | Mid   | First – Second | -44.70 | 1.07 | -41.73 | < <b>0.001</b> |
| Infection by powdery mildew on upper leaf side (%) | Mid   | First – Third  | -25.10 | 3.67 | -6.83  | < <b>0.001</b> |
| Infection by powdery mildew on upper leaf side (%) | Mid   | Second - Third | 19.60  | 3.67 | 5.35   | < <b>0.001</b> |
| Infection by powdery mildew on upper leaf side (%) | Late  | First – Second | -53.40 | 1.28 | -41.73 | < <b>0.001</b> |
| Infection by powdery mildew on upper leaf side (%) | Late  | First – Third  | -32.10 | 2.39 | -13.44 | < <b>0.001</b> |
| Infection by powdery mildew on upper leaf side (%) | Late  | Second - Third | 21.20  | 2.47 | 8.61   | < <b>0.001</b> |
| Infection by powdery mildew on lower leaf side (%) | Early | First – Second | -1.50  | 0.19 | -7.92  | < <b>0.001</b> |
| Infection by powdery mildew on lower leaf side (%) | Mid   | First – Second | -11.50 | 0.57 | -20.09 | < <b>0.001</b> |
| Infection by powdery mildew on lower leaf side (%) | Mid   | First – Third  | 12.80  | 1.96 | 6.54   | < <b>0.001</b> |
| Infection by powdery mildew on lower leaf side (%) | Mid   | Second - Third | 24.30  | 1.96 | 12.41  | < <b>0.001</b> |
| Infection by powdery mildew on lower leaf side (%) | Late  | First – Second | -23.13 | 1.13 | -20.48 | < <b>0.001</b> |
| Infection by powdery mildew on lower leaf side (%) | Late  | First – Third  | -14.90 | 2.11 | -7.07  | < <b>0.001</b> |
| Infection by powdery mildew on lower leaf side (%) | Late  | Second - Third | 8.24   | 2.18 | 3.79   | < <b>0.001</b> |

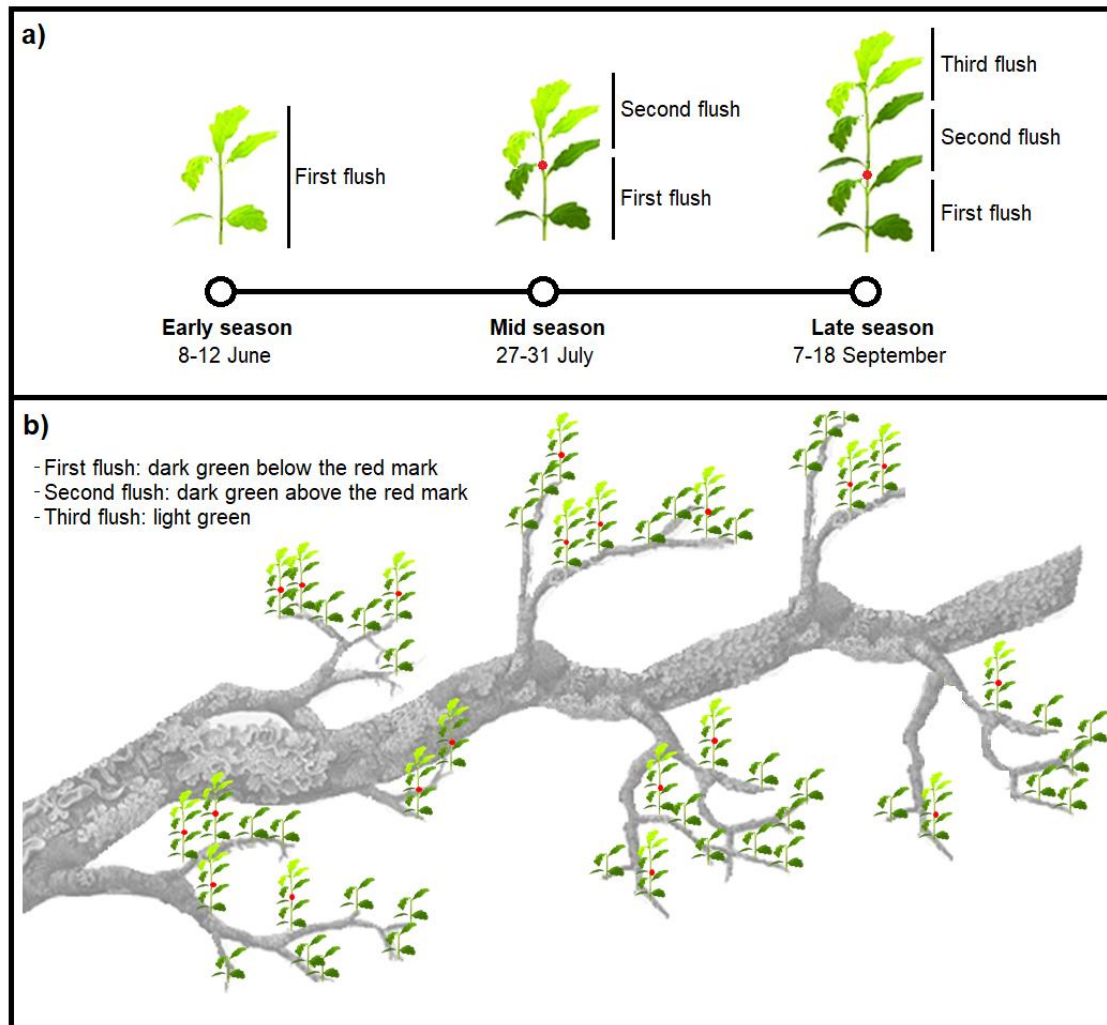

**Figure S1.** An example to illustrate how we distinguished leaves from different oak leaf flushes (*Quercus robur*), and to clarify our sampling strategy where we randomly sampled leaves within the subset of leaves belonging to a given flush. In the scenario depicted, the tree has one leaf flush during the early season, two leaf flushes during the mid season and three leaf flushes during the late season. Panel **a** illustrates the approach to distinguish between leaf flushes in each season. During the early season, only a single leaf flush was present. During the mid season, we could easily recognize leaves from the first and second leaf flush, as they differ in their shade of green. At this time point, we marked the places where the first leaf flush ends (in red) and the second leaf flush begins with coloured cable ties. During the late season, we could distinguish leaves belonging to the first and second flush with the help of the coloured cable ties, and we could recognize leaves from the third leaf flush by the lighter shade of green. In some locations, where the second leaf flush is only produced during the late part of the season, it was unnecessary to use cable ties. We do note that the cable ties were used to facilitate and speed up the process of distinguishing between the leaf flushes, as the leaf

flushes can also be easily (though not as quickly) distinguished anatomically by the nodes. Panel **b** illustrates an oak branch matching the late-season scenario depicted in panel **a**, where we randomly sampled: i) 15 leaves from the subset of leaves belonging to the first flush, ii) 15 leaves from the subset of leaves belonging to the second flush and iii) 15 leaves from the subset of leaves belonging to the third flush. Note that for each tree, we repeated this sampling for two branches, resulting in a total of 30 leaves from each leaf flush.

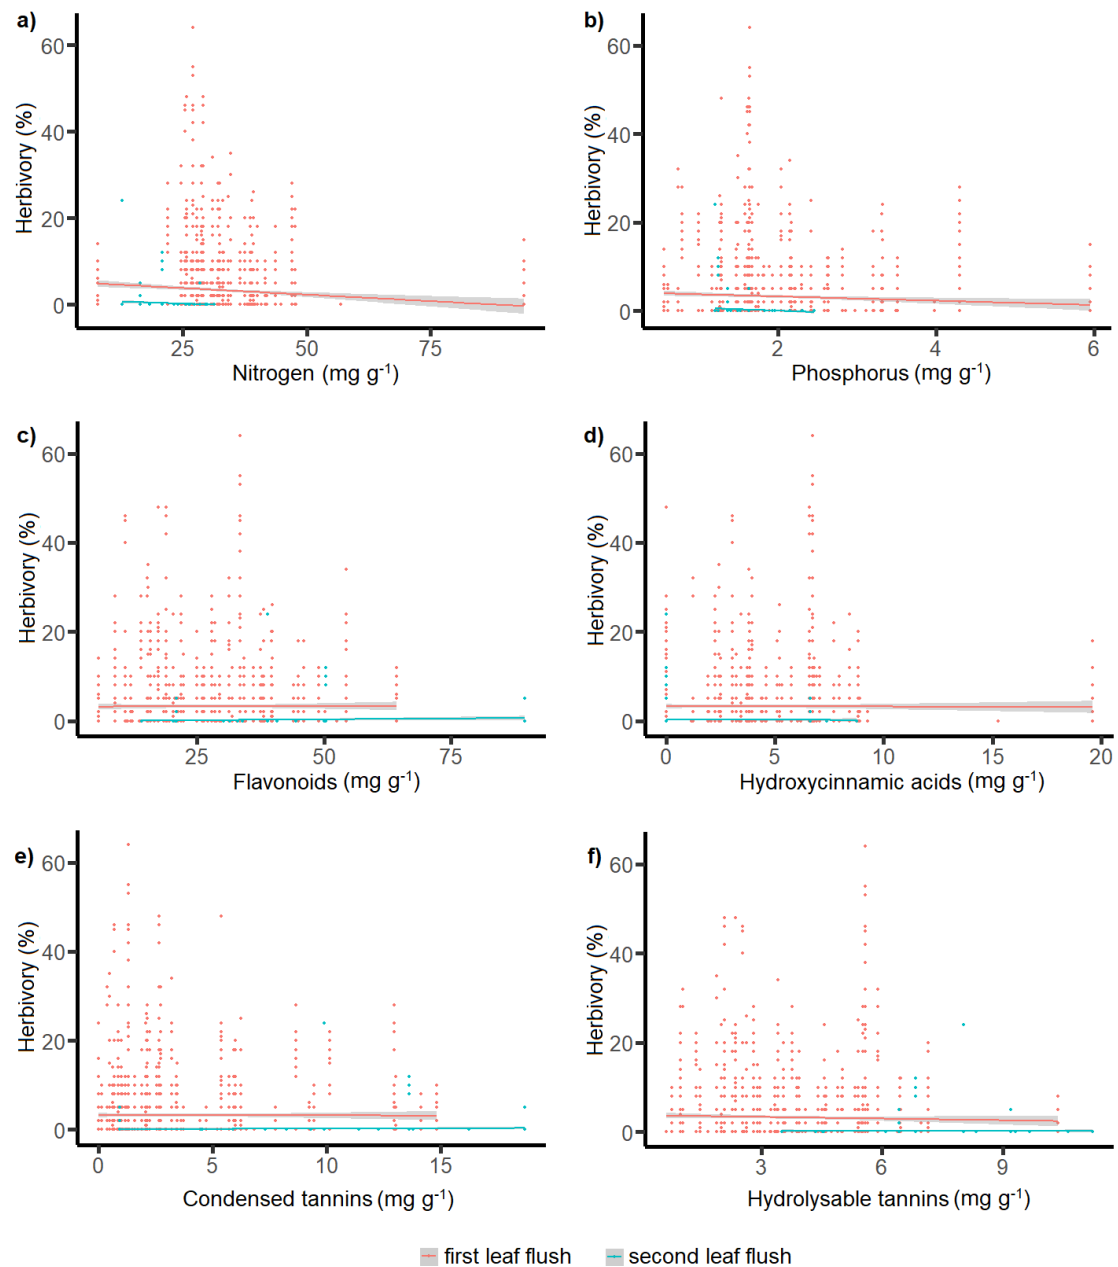

**Figure S2.** The effect of concentrations of **a)** nitrogen, **b)** phosphorus, **c)** flavonoids, **d)** hydroxycinnamic acids, **e)** condensed tannins and **f)** hydrolysable tannins on the percentage of free-feeding herbivory during the early season in oak leaves (*Quercus robur*). Shown are regression lines with their associated standard error (shaded area), separately for each leaf flush. Concentrations are expressed in mg g<sup>-1</sup> of dry tissue.

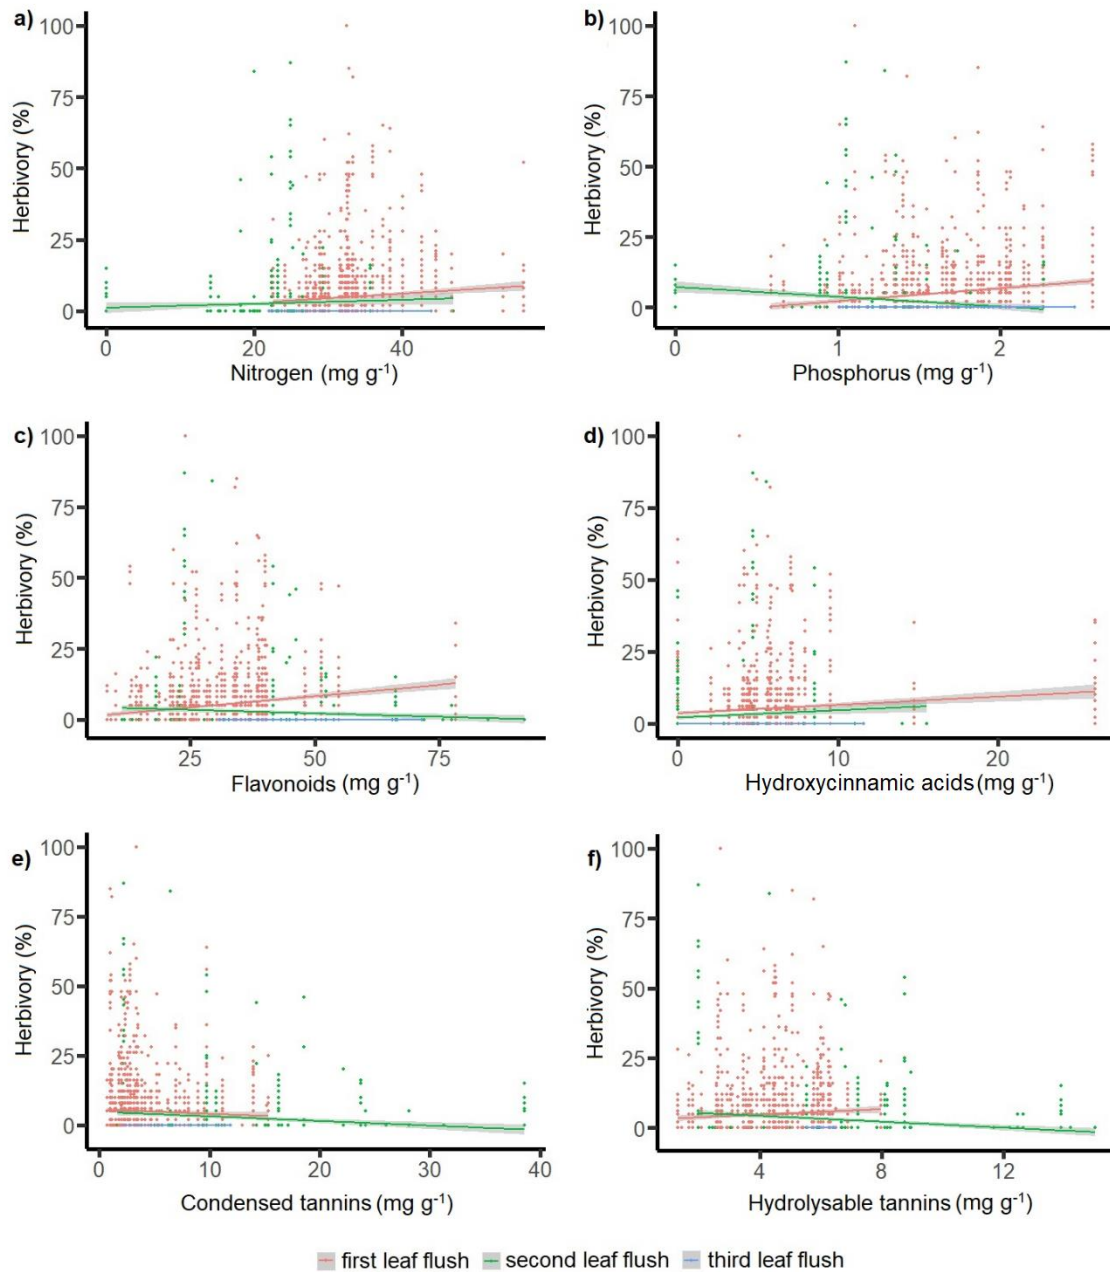

**Figure S3.** The effect of concentrations of **a)** nitrogen, **b)** phosphorus, **c)** flavonoids, **d)** hydroxycinnamic acids, **e)** condensed tannins and **f)** hydrolysable tannins on the percentage of free-feeding herbivory during the mid season in oak leaves (*Quercus robur*). Shown are regression lines with their associated standard error (shaded area), separately for each leaf flush. Concentrations are expressed in  $\text{mg g}^{-1}$  of dry tissue.



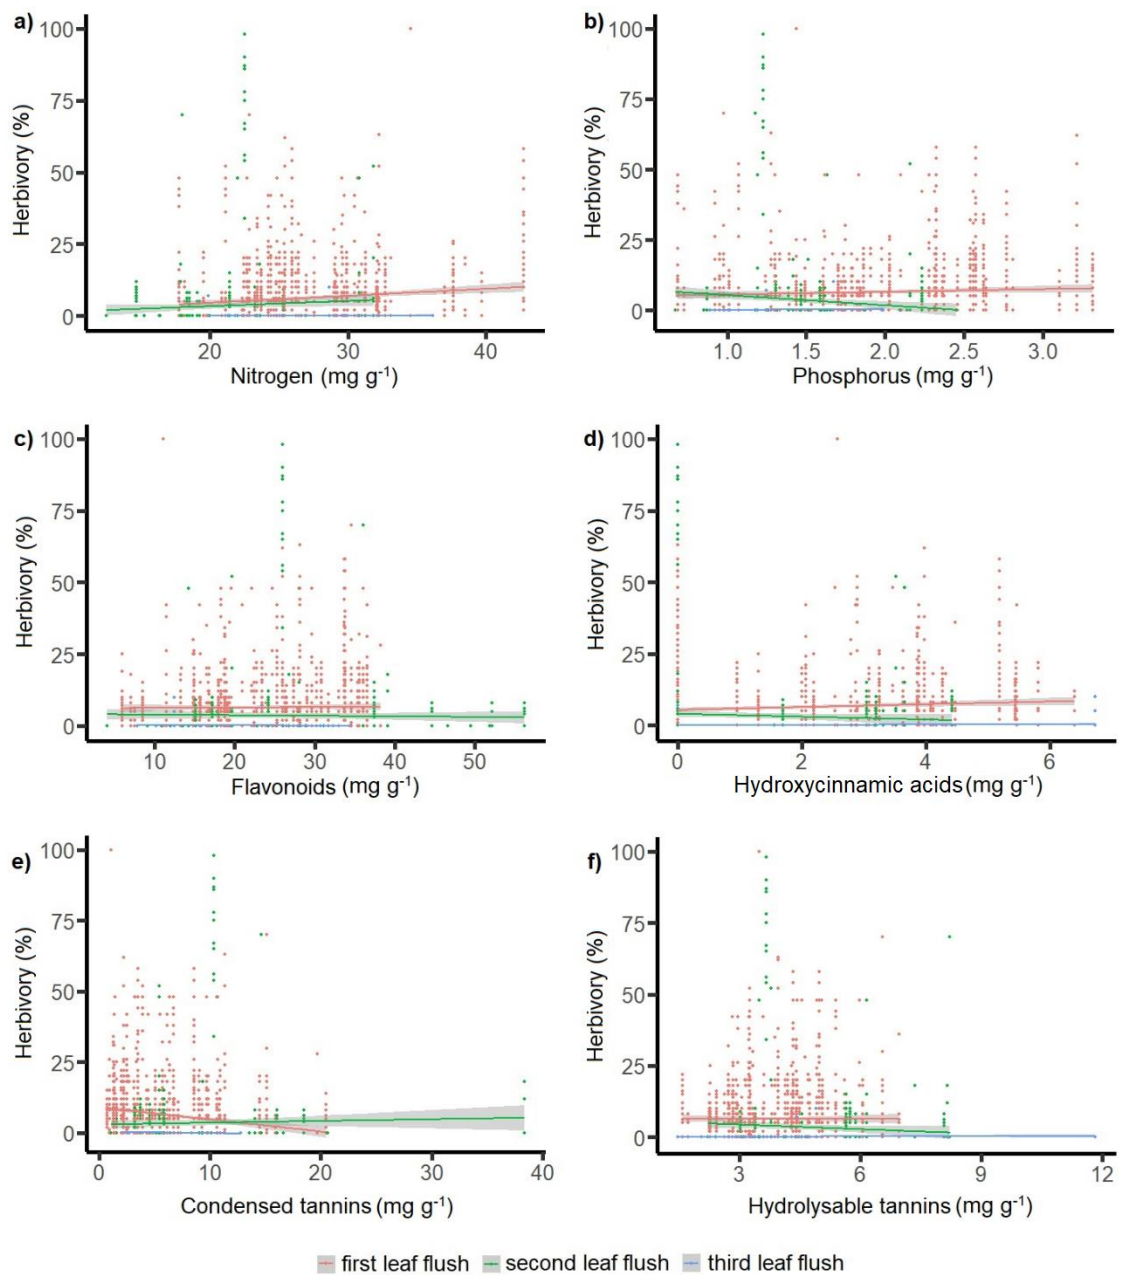

**Figure S4.** The effect of concentrations of **a)** nitrogen, **b)** phosphorus, **c)** flavonoids, **d)** hydroxycinnamic acids, **e)** condensed tannins and **f)** hydrolysable tannins on the percentage of free-feeding herbivory during the late season in oak leaves (*Quercus robur*). Shown are regression lines with their associated standard error (shaded area), separately for each leaf flush. Concentrations are expressed in mg g<sup>-1</sup> of dry tissue.

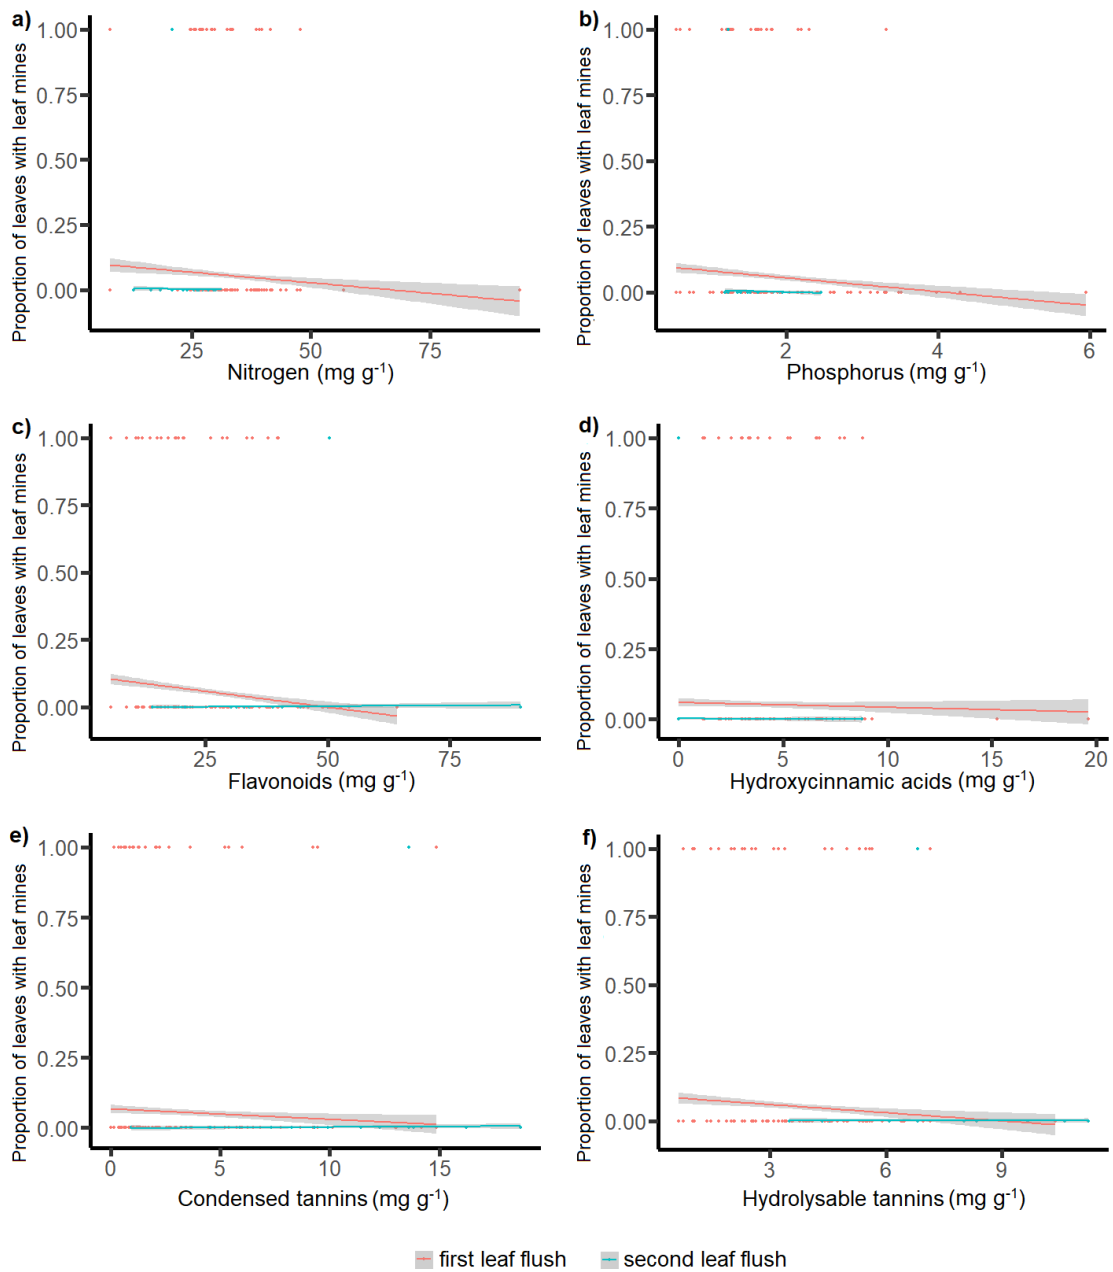

**Figure S5.** The effect of concentrations of **a)** nitrogen, **b)** phosphorus, **c)** flavonoids, **d)** hydroxycinnamic acids, **e)** condensed tannins and **f)** hydrolysable tannins on the proportion of leaves with leaf mines during the early season in oak leaves (*Quercus robur*). Shown are regression lines with their associated standard error (shaded area), separately for each leaf flush. Concentrations are expressed in  $\text{mg g}^{-1}$  of dry tissue.

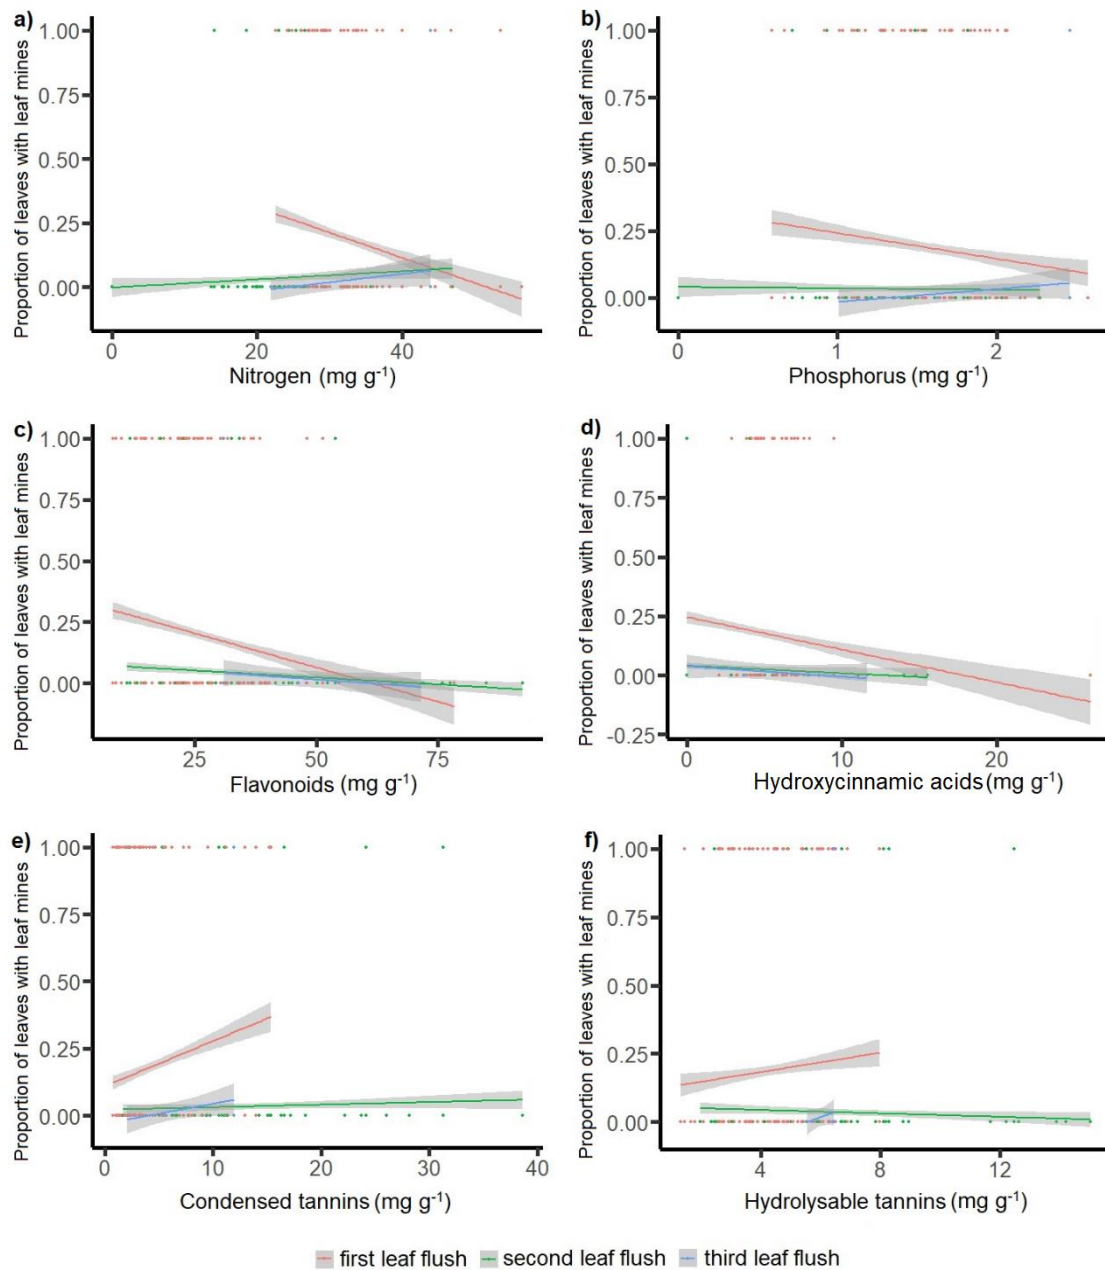

**Figure S6.** The effect of concentrations of **a)** nitrogen, **b)** phosphorus, **c)** flavonoids, **d)** hydroxycinnamic acids, **e)** condensed tannins and **f)** hydrolysable tannins on the proportion of leaves with leaf mines during the mid season in oak leaves (*Quercus robur*). Shown are regression lines with their associated standard error (shaded area), separately for each leaf flush. Concentrations are expressed in mg g<sup>-1</sup> of dry tissue.

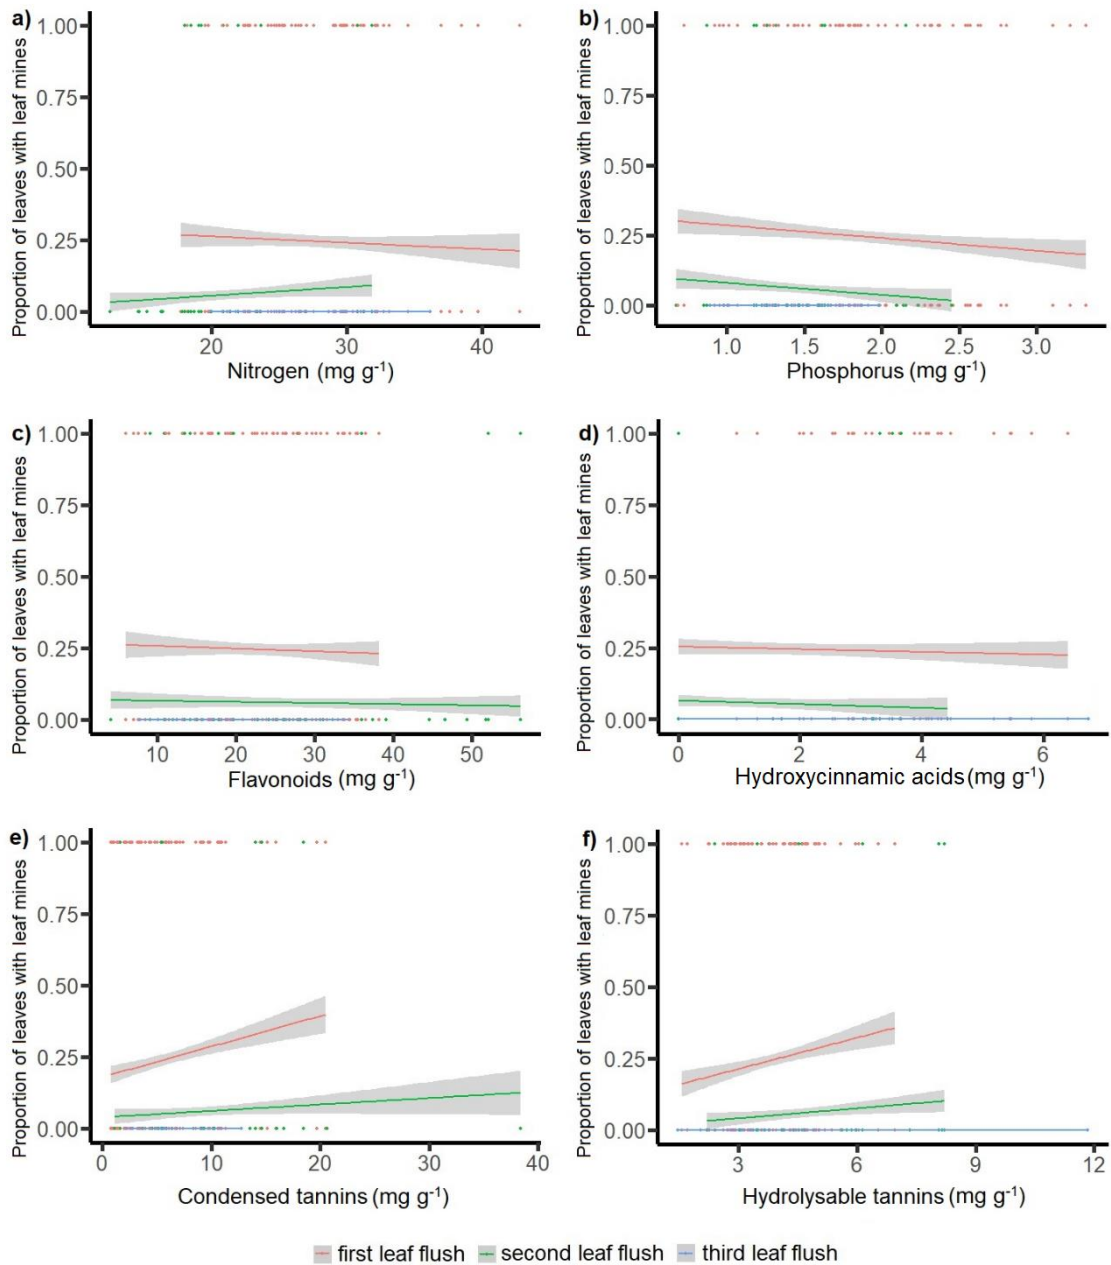

**Figure S7.** The effect of concentrations of **a)** nitrogen, **b)** phosphorus, **c)** flavonoids, **d)** hydroxycinnamic acids, **e)** condensed tannins and **f)** hydrolysable tannins on the proportion of leaves with leaf mines during the late season in oak leaves (*Quercus robur*). Shown are regression lines with their associated standard error (shaded area), separately for each leaf flush. Concentrations are expressed in  $\text{mg g}^{-1}$  of dry tissue.

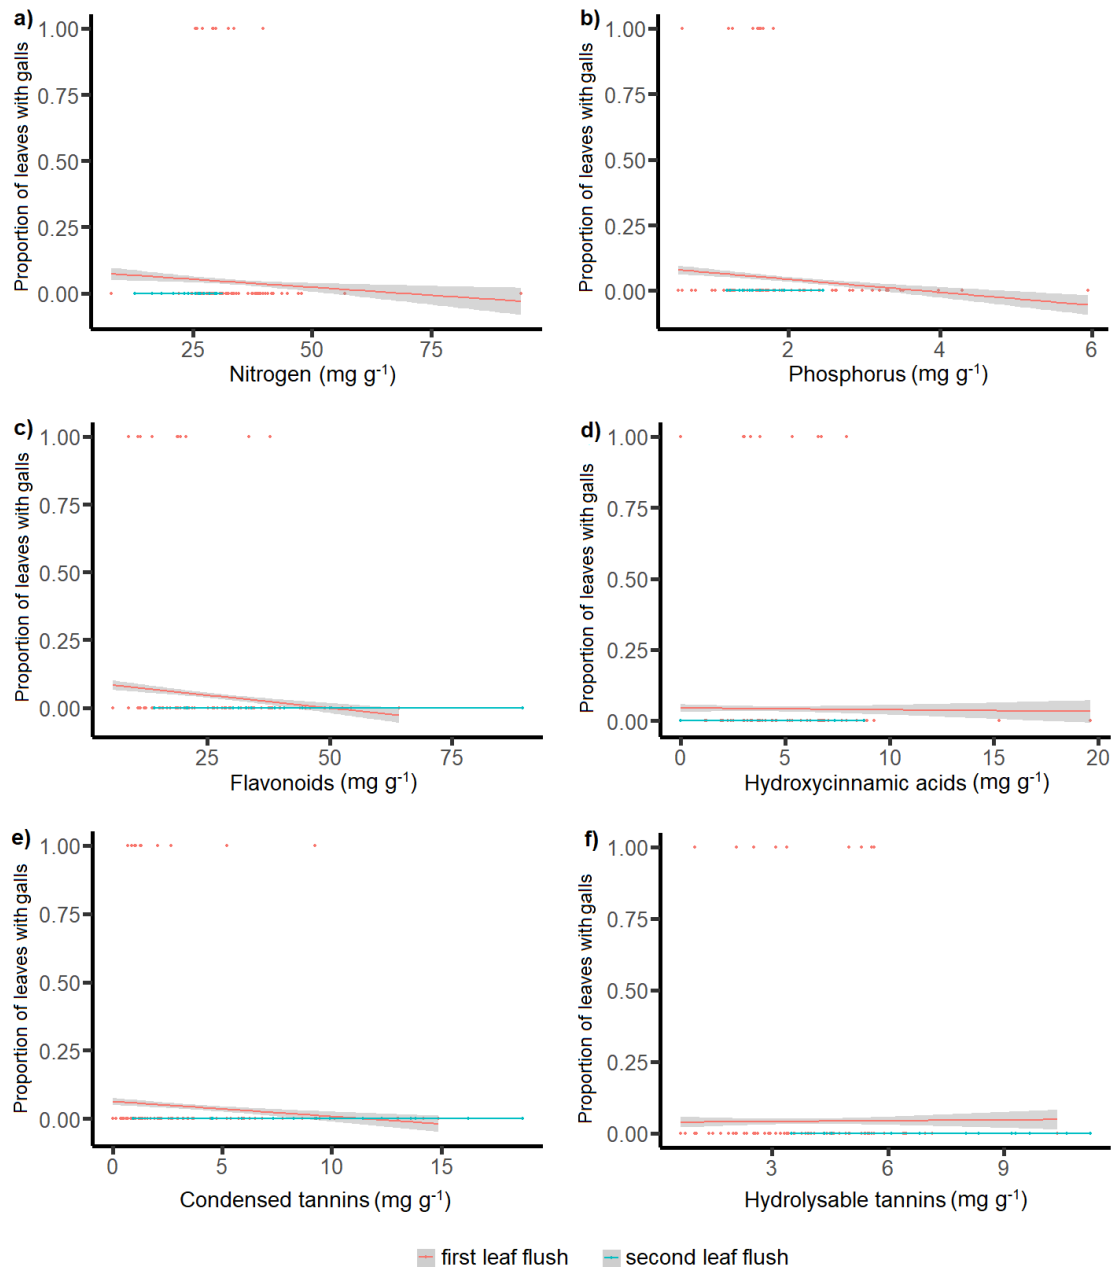

**Figure S8.** The effect of concentrations of **a)** nitrogen, **b)** phosphorus, **c)** flavonoids, **d)** hydroxycinnamic acids, **e)** condensed tannins and **f)** hydrolysable tannins on the proportion of leaves with galls during the early season in oak leaves (*Quercus robur*). Shown are regression lines with their associated standard error (shaded area), separately for each leaf flush. Concentrations are expressed in  $\text{mg g}^{-1}$  of dry tissue.

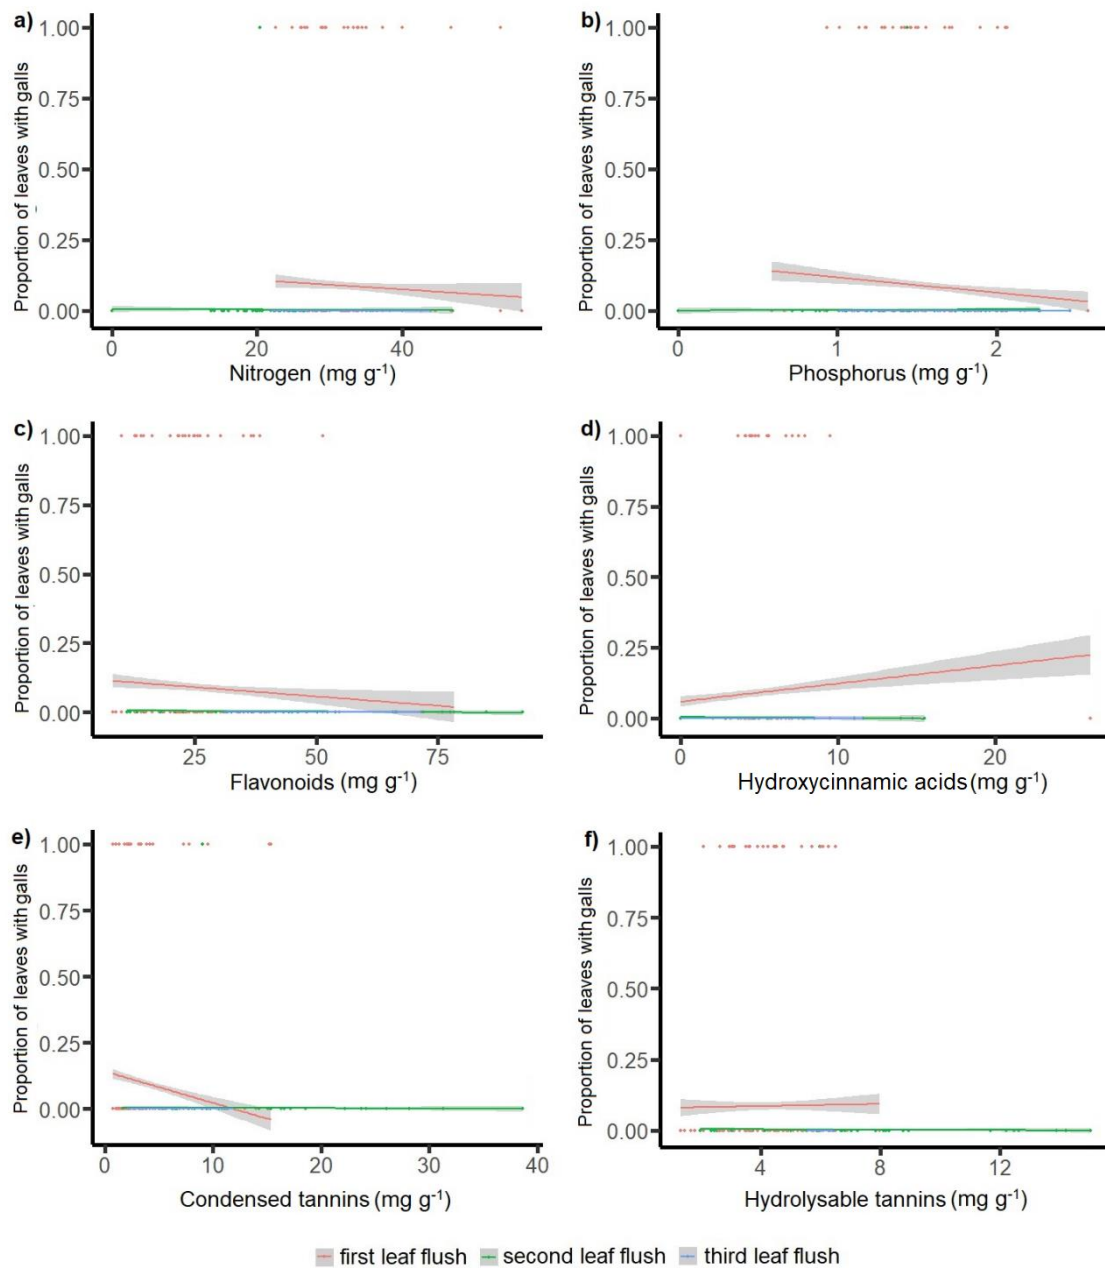

**Figure S9.** The effect of concentrations of **a)** nitrogen, **b)** phosphorus, **c)** flavonoids, **d)** hydroxycinnamic acids, **e)** condensed tannins and **f)** hydrolysable tannins on the proportion of leaves with galls during the mid season in oak leaves (*Quercus robur*). Shown are regression lines with their associated standard error (shaded area), separately for each leaf flush. Concentrations are expressed in mg g<sup>-1</sup> of dry tissue.

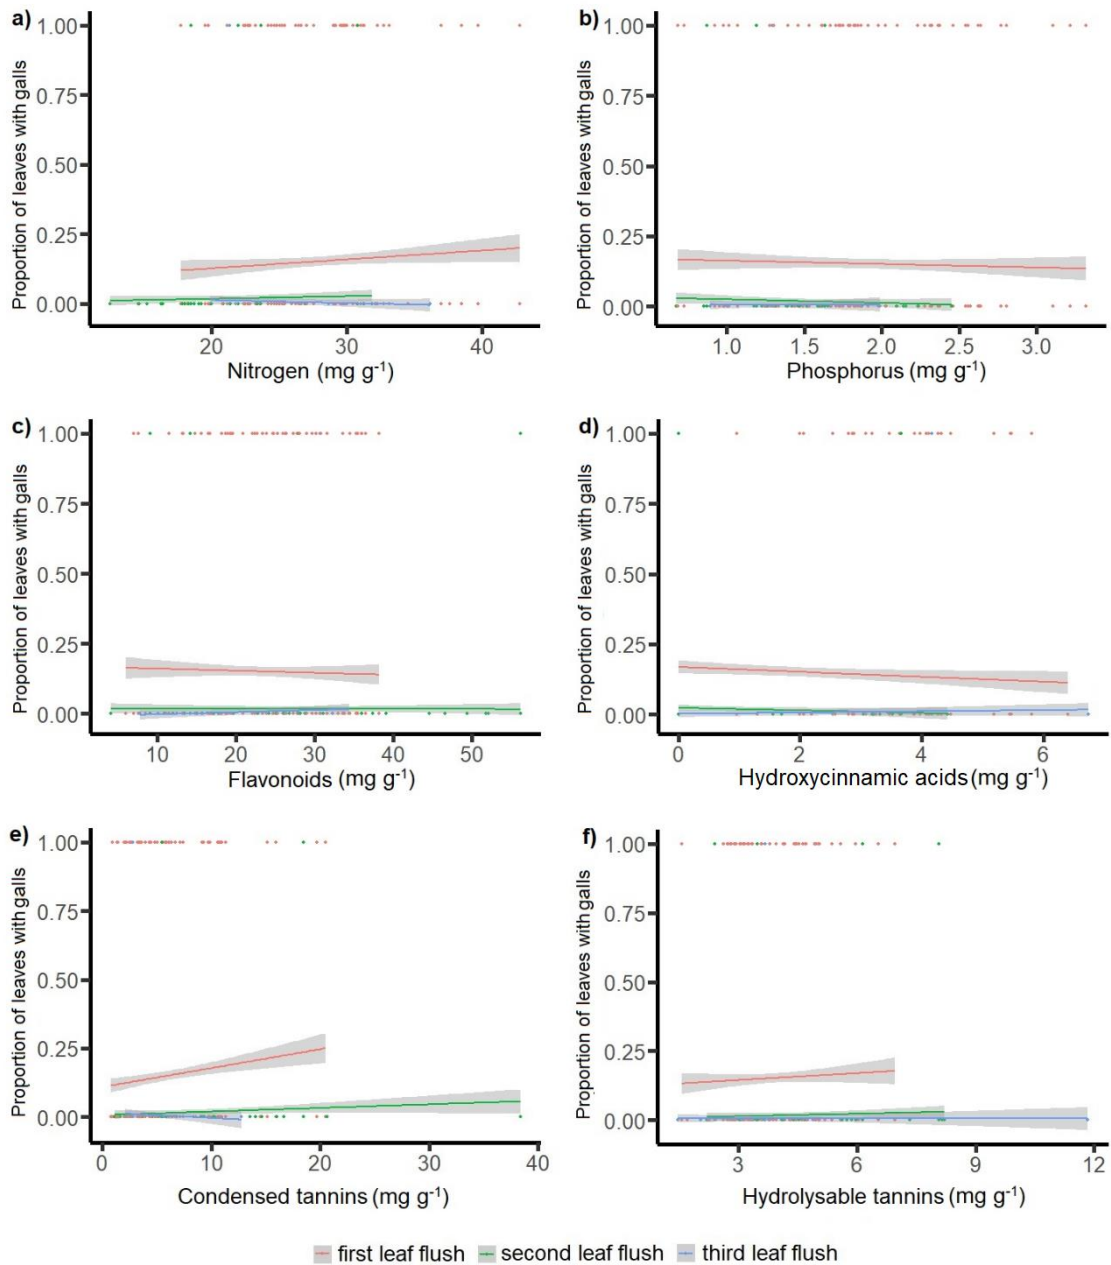

**Figure S10.** The effect of concentrations of **a)** nitrogen, **b)** phosphorus, **c)** flavonoids, **d)** hydroxycinnamic acids, **e)** condensed tannins and **f)** hydrolysable tannins on the proportion of leaves with galls during the late season in oak leaves (*Quercus robur*). Shown are regression lines with their associated standard error (shaded area), separately for each leaf flush. Concentrations are expressed in  $\text{mg g}^{-1}$  of dry tissue.

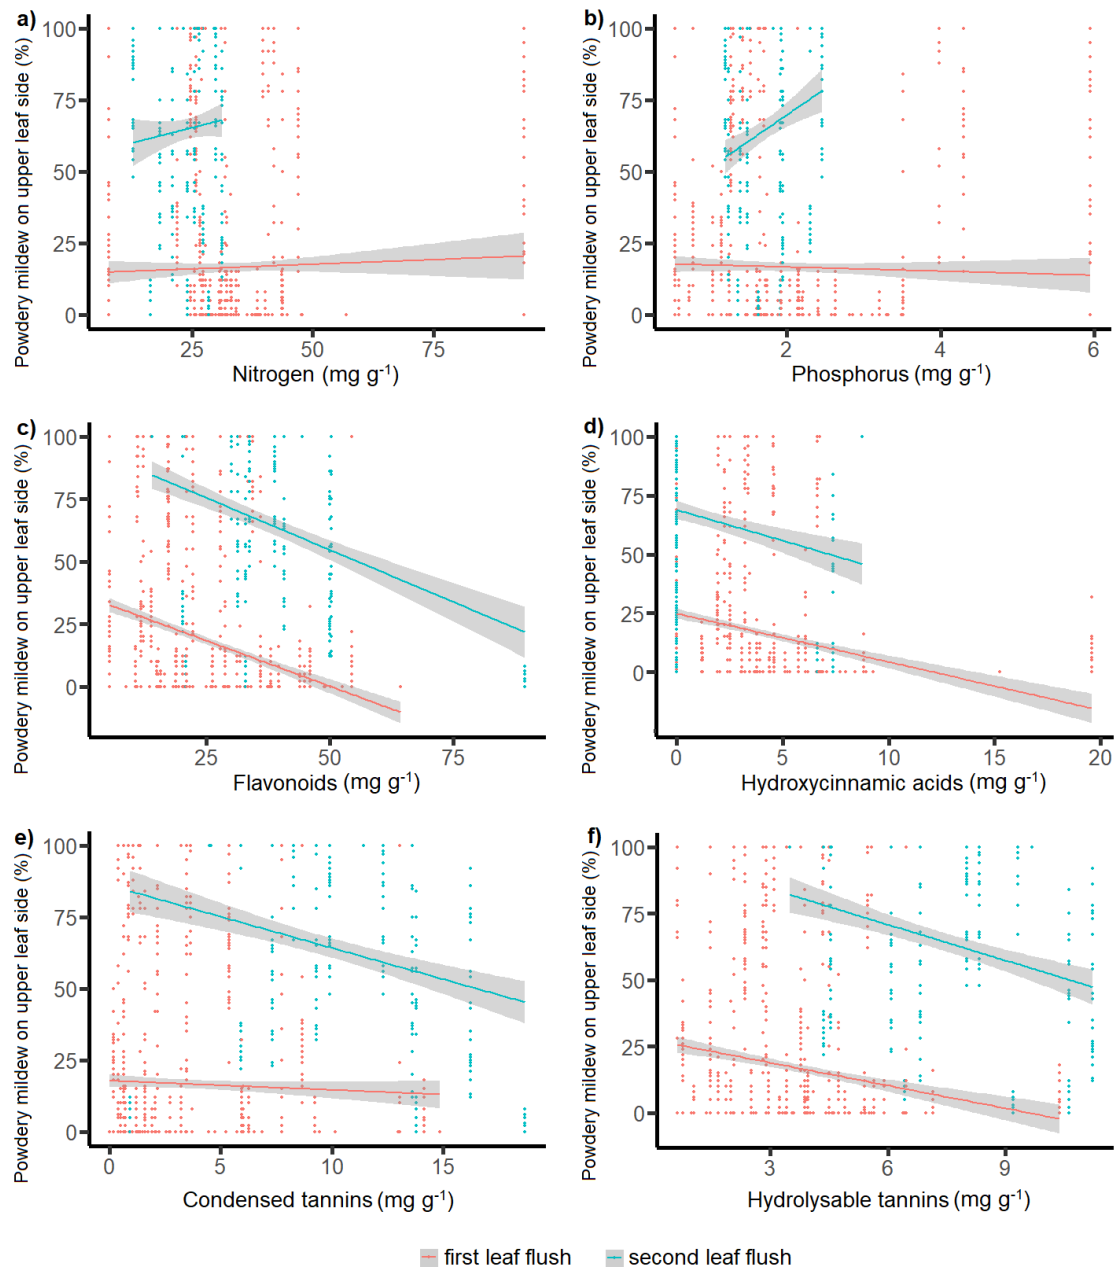

**Figure S11.** The effect of concentrations of **a)** nitrogen, **b)** phosphorus, **c)** flavonoids, **d)** hydroxycinnamic acids, **e)** condensed tannins and **f)** hydrolysable tannins in infection by oak powdery mildew (*Erysiphe* spp.) on the upper leaf side of the pedunculate oak *Quercus robur* during the early season. Shown are regression lines with their associated standard error (shaded area), separately for each leaf flush. Concentrations are expressed in mg g<sup>-1</sup> of dry tissue.



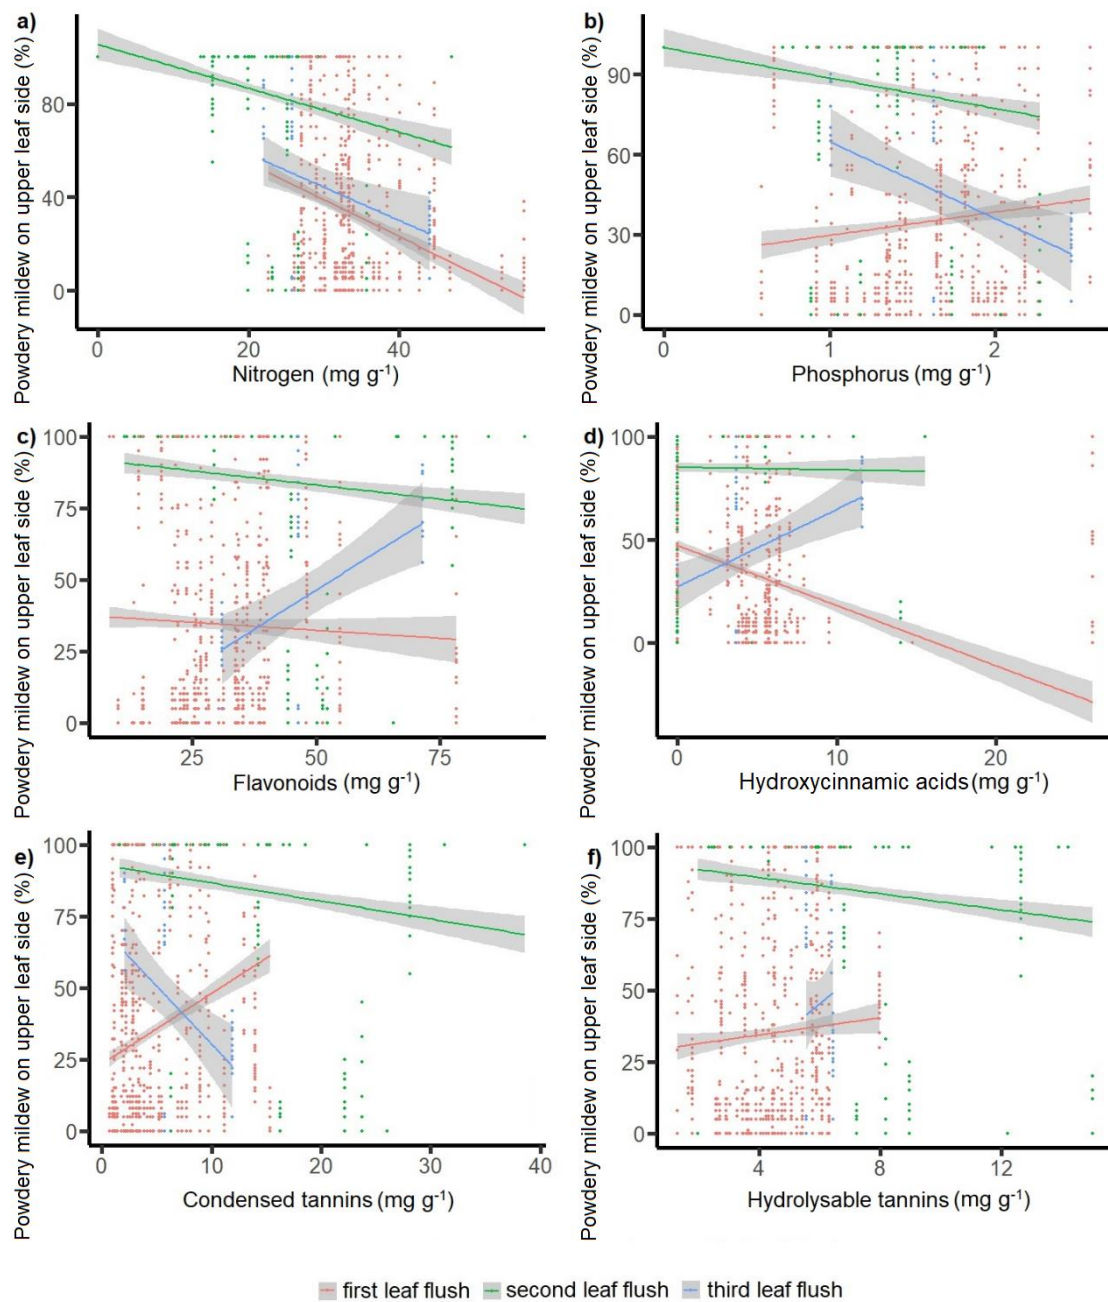

**Figure S12.** The effect of concentrations of **a)** nitrogen, **b)** phosphorus, **c)** flavonoids, **d)** hydroxycinnamic acids, **e)** condensed tannins and **f)** hydrolysable tannins in infection by oak powdery mildew (*Erysiphe* spp.) on the upper leaf side of the pedunculate oak *Quercus robur* during the mid season. Shown are regression lines with their associated standard error (shaded area), separately for each leaf flush. Concentrations are expressed in  $\text{mg g}^{-1}$  of dry tissue.

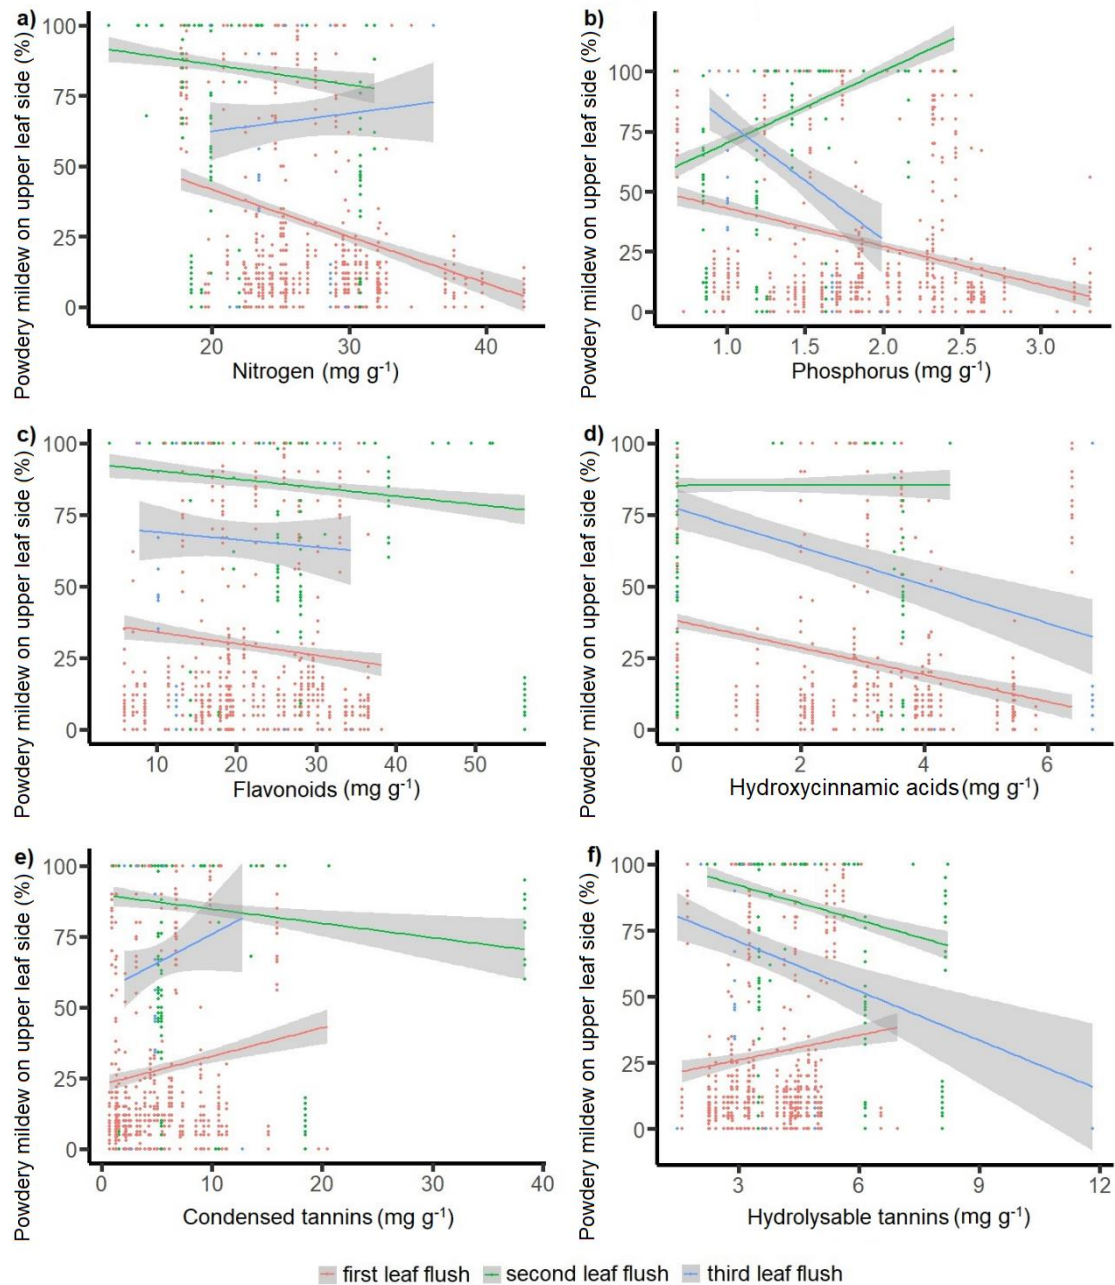

**Figure S13.** The effect of concentrations of **a)** nitrogen, **b)** phosphorus, **c)** flavonoids, **d)** hydroxycinnamic acids, **e)** condensed tannins and **f)** hydrolysable tannins in infection by oak powdery mildew (*Erysiphe* spp.) on the upper leaf side of the pedunculate oak *Quercus robur* during the late season. Shown are regression lines with their associated standard error (shaded area), separately for each leaf flush. Concentrations are expressed in  $\text{mg g}^{-1}$  of dry tissue.

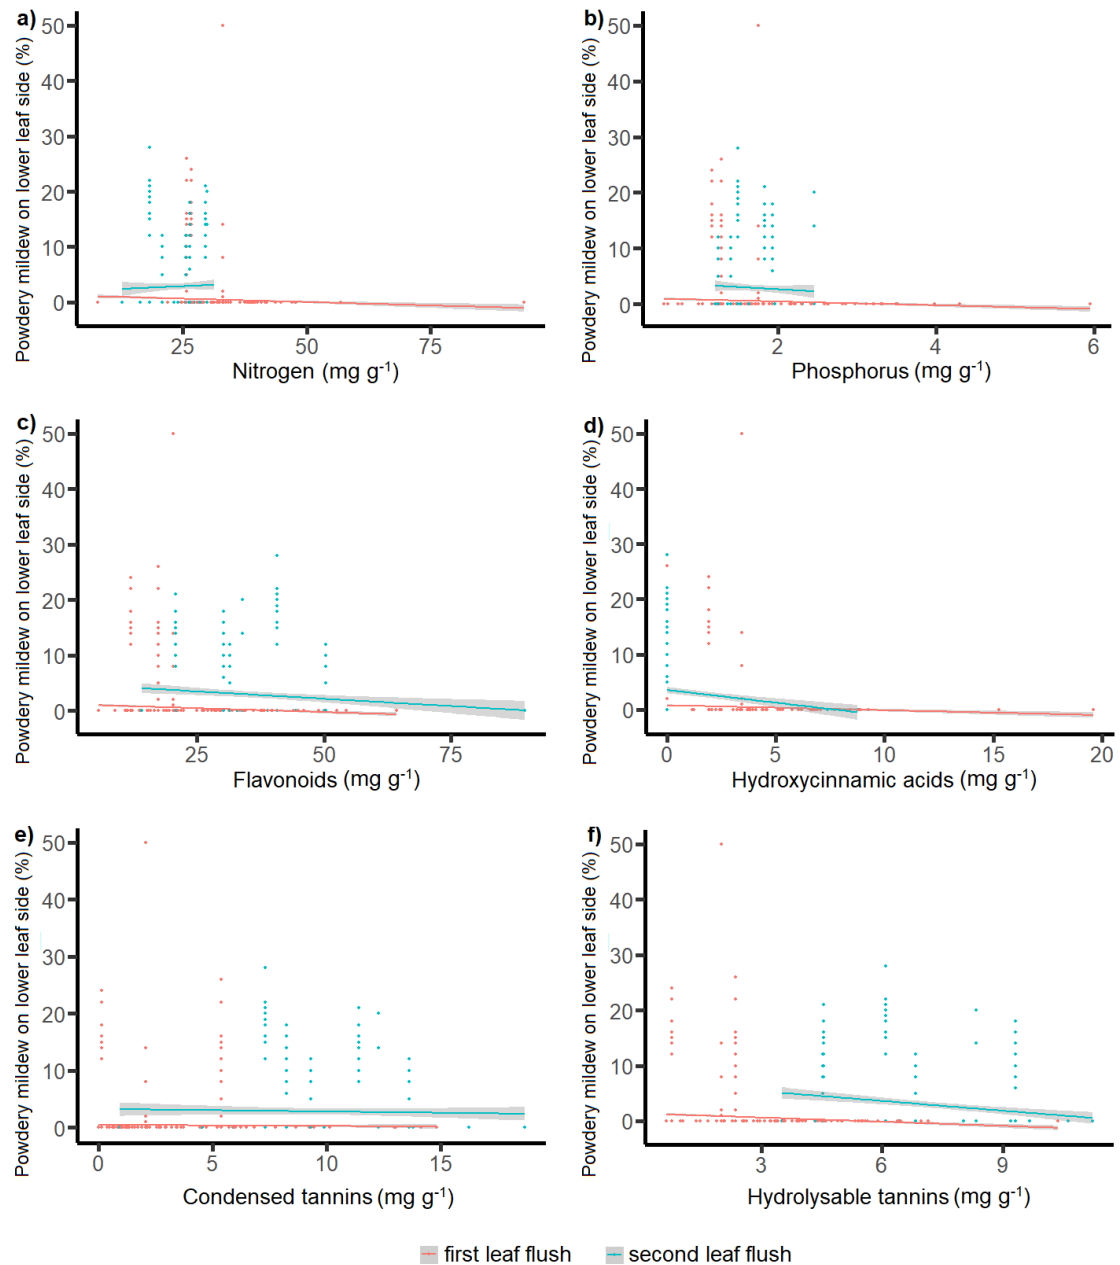

**Figure S14.** The effect of concentrations of **a)** nitrogen, **b)** phosphorus, **c)** flavonoids, **d)** hydroxycinnamic acids, **e)** condensed tannins and **f)** hydrolysable tannins in infection by oak powdery mildew (*Erysiphe* spp.) on the lower lower leaf side of the pedunculate oak *Quercus robur* during the early season. Shown are regression lines with their associated standard error (shaded area), separately for each leaf flush. Concentrations are expressed in mg g<sup>-1</sup> of dry tissue.

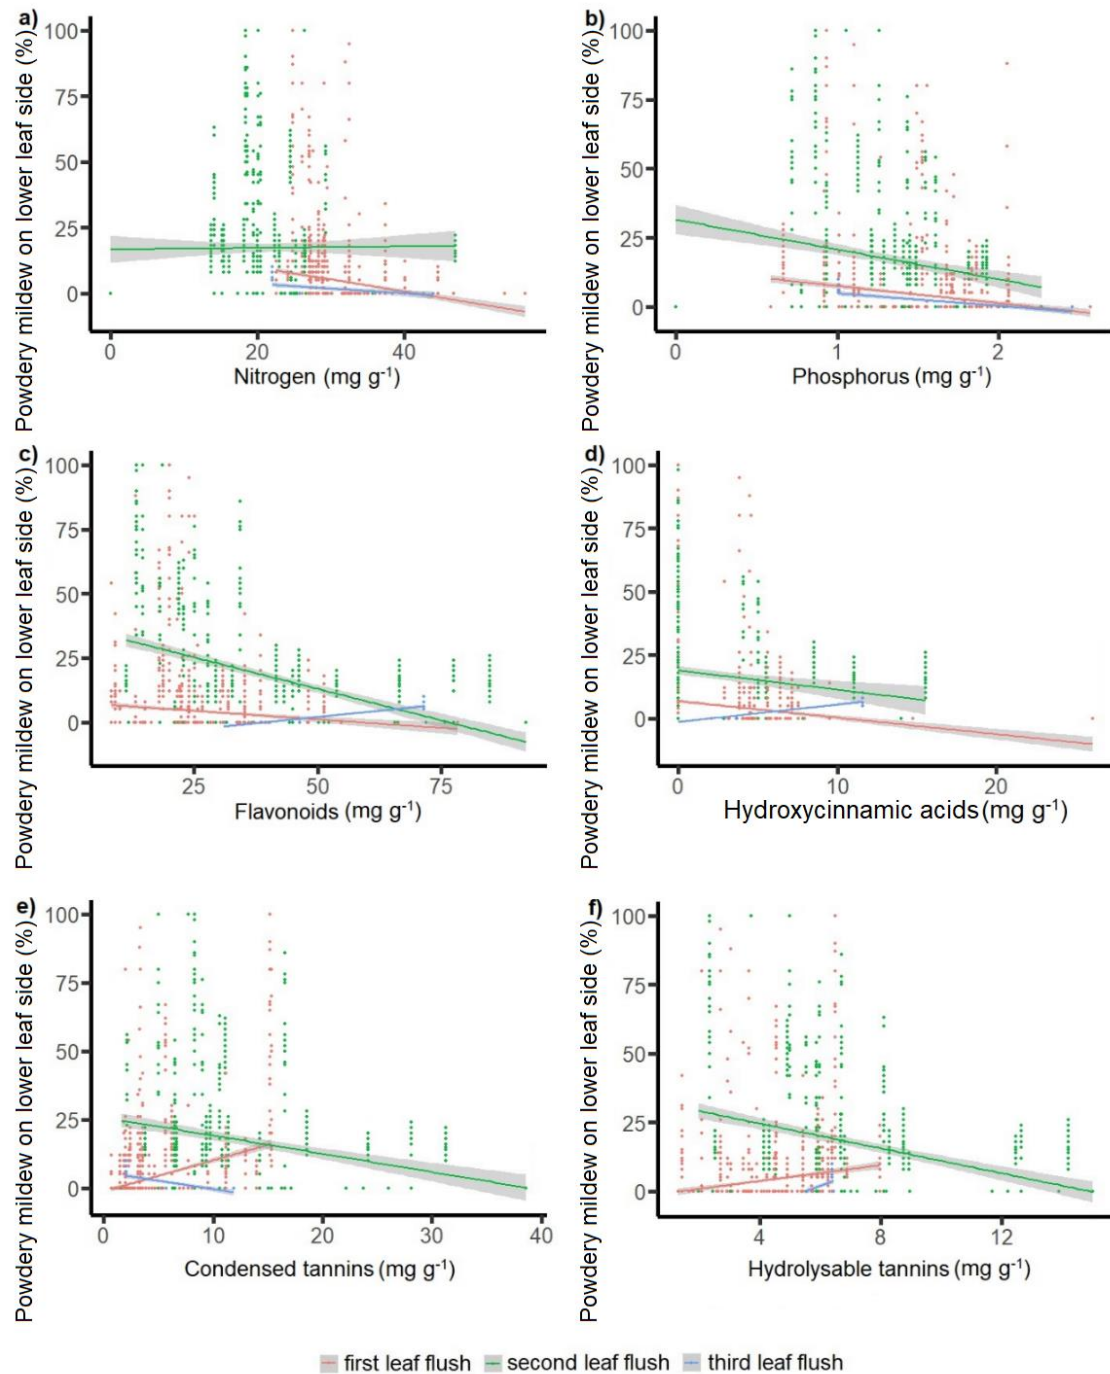

**Figure S15.** The effect of concentrations of **a)** nitrogen, **b)** phosphorus, **c)** flavonoids, **d)** hydroxycinnamic acids, **e)** condensed tannins and **f)** hydrolysable tannins in infection by oak powdery mildew (*Erysiphe* spp.) on the lower leaf side of the pedunculate oak *Quercus robur* during the mid season. Shown are regression lines with their associated standard error (shaded area), separately for each leaf flush. Concentrations are expressed in mg g<sup>-1</sup> of dry tissue.

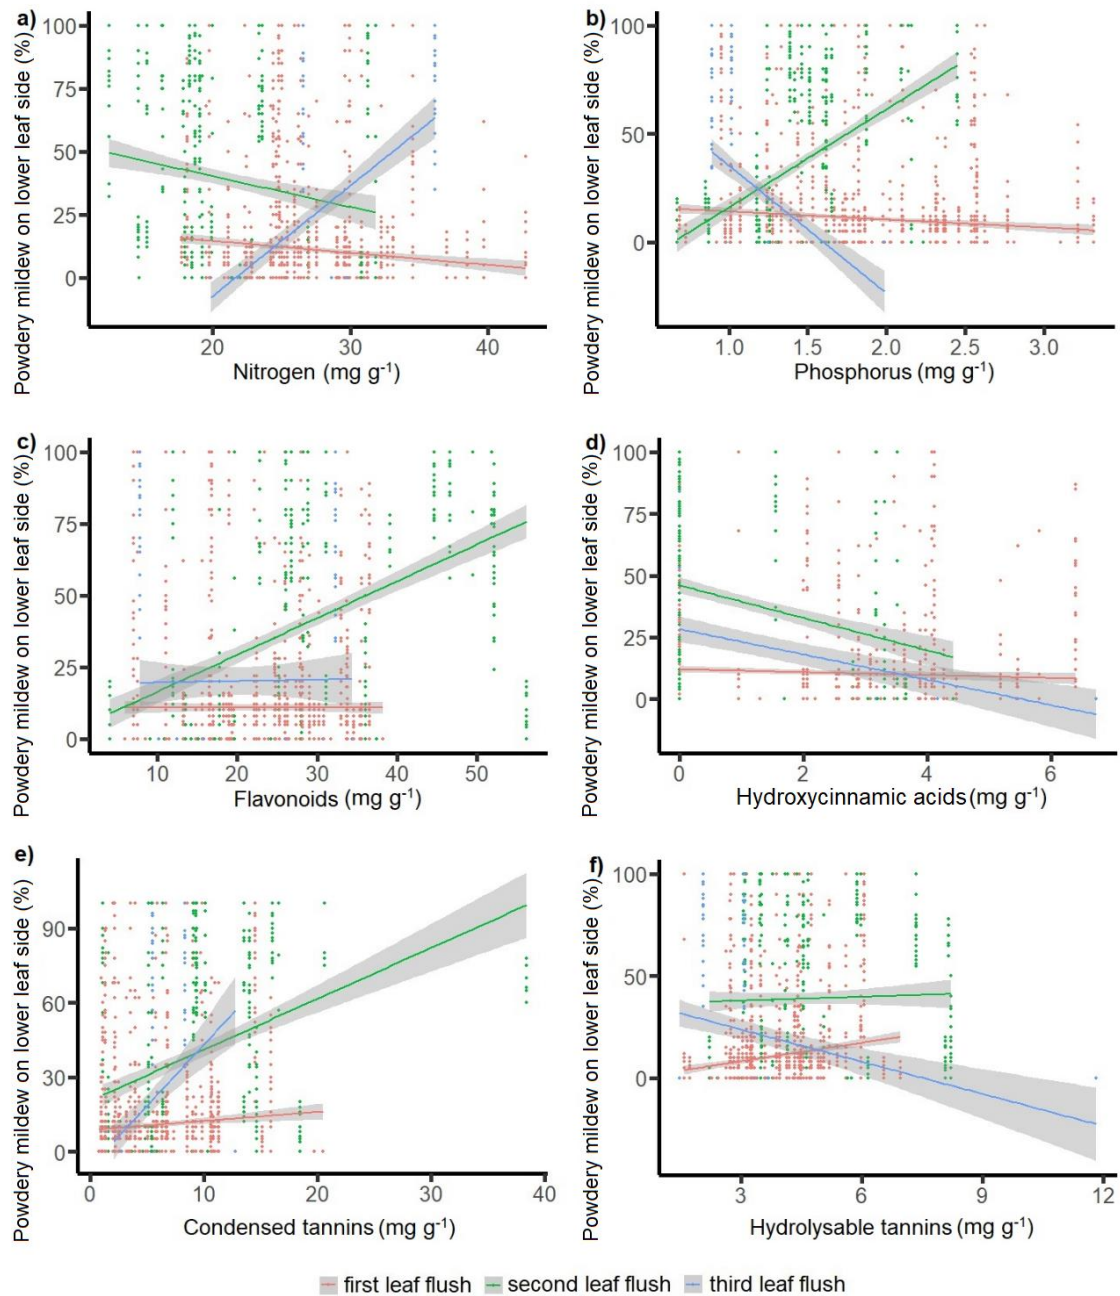

**Figure S16.** The effect of concentrations of **a)** nitrogen, **b)** phosphorus, **c)** flavonoids, **d)** hydroxycinnamic acids, **e)** condensed tannins and **f)** hydrolysable tannins in infection by oak powdery mildew (*Erysiphe* spp.) on the lower leaf side of the pedunculate oak *Quercus robur* during the late season. Shown are regression lines with their associated standard error (shaded area), separately for each leaf flush. Concentrations are expressed in  $\text{mg g}^{-1}$  of dry tissue.

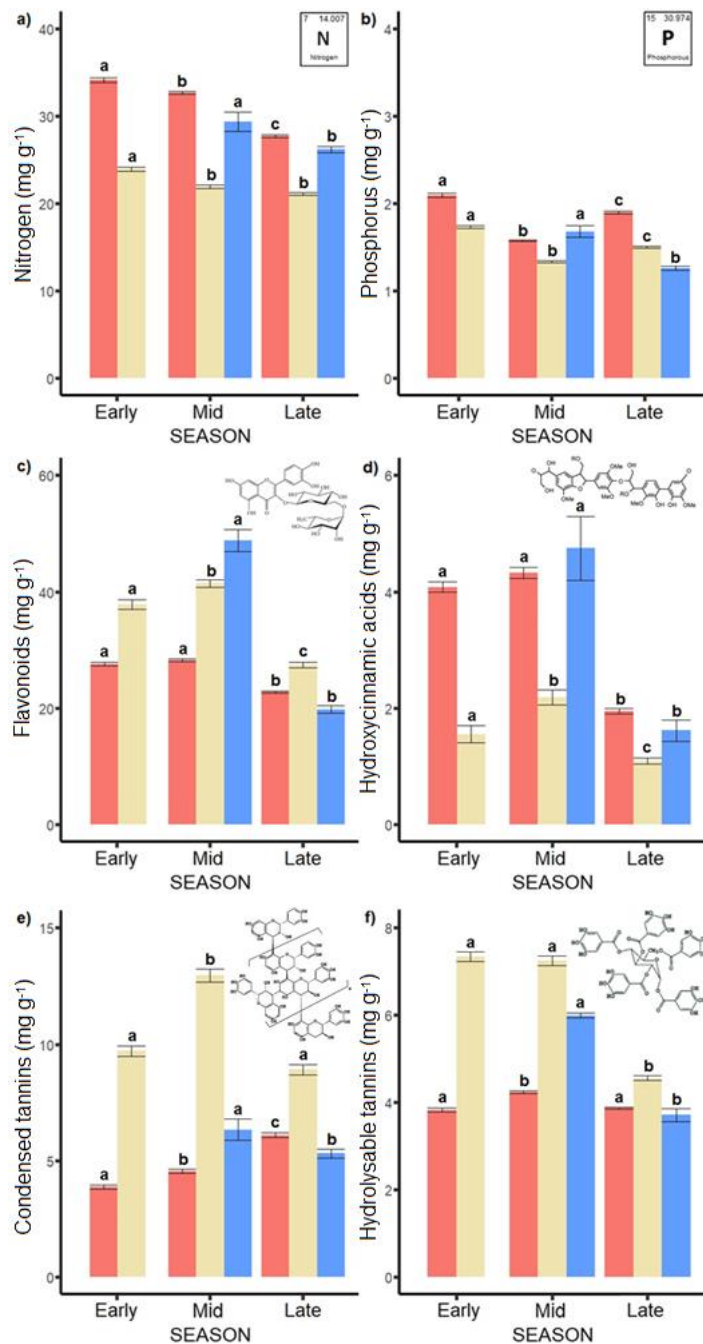

**Figure S17.** Differences among oak leaf flushes (*Quercus robur*) in the concentration of primary (a) nitrogen, b) phosphorus) and secondary compounds (c) flavonoids, d) hydroxycinnamic acids, e) condensed tannins and f) hydrolysable tannins) during the early, mid and late season. Concentrations are expressed in mg g<sup>-1</sup> of dry tissue. Bars represent means and error bars represent standard errors. Significant differences within leaf flushes among seasons are indicated by different letters above bars ( $p < 0.05$ ).

**NOTES S1:** Example of HPLC chromatogram with all the compounds detected.

**Table N1.** List of compounds detected by HPLC in the example presented in Fig. A1. Shown are the peak identity in Fig. A1, retention time in minutes (RT), experimental mass (molar mass), major ions (MS/MS), detected compound and class of the detected compound.

| Peak | RT  | Experimental Mass<br>m/z [M-H] | MS/MS (m/z)                                            | Compound                               | Compound class       |
|------|-----|--------------------------------|--------------------------------------------------------|----------------------------------------|----------------------|
| 1    | 2.5 | 191.0567                       | 127, 109, 93, 85                                       | Quinic acid                            | Hydroxycinnamic acid |
| 2    | 4.6 | 457.0565                       | 109, 121, 125, 137, 151, 159, 168, 179, 192, 287, 305, | Epigallocatechin gallate               | Condensed tannin     |
| 3    | 5.0 | 933.0695                       | 915, 871, 613, 569, 493, 489, 467, 340, 300, 249, 125  | Castalagin                             | Hydrolyzable tannin  |
| 4    | 5.3 | 783.0697                       | 481, 301, 275, 249, 169                                | Gallotannin                            | Hydrolyzable tannin  |
| 5    | 5.4 | 1101.0800                      | 1083, 1039, 995, 915, 613, 577, 569, 425               | Ellagitannin (Punicalagin-like)        | Hydrolyzable tannin  |
| 6    | 5.5 | 337.0917                       | 191, 163, 119                                          | Coumaroyl quinic acid                  | Hydroxycinnamic acid |
| 7    | 6.2 | 367.1054                       | 193, 191, 149, 134, 117                                | Feruloyl quinic acid                   | Hydroxycinnamic acid |
| 8    | 6.4 | 289.0558                       | 109, 121, 123, 125, 137, 151                           | Epigallocatechin                       | Condensed tannin     |
| 9    | 6.5 | 657.1848                       | 367, 193                                               | Feruloyl quinic acid derivative        | Hydroxycinnamic acid |
| 10   | 6.7 | 463.0885                       | 301                                                    | Quercetin hexoside                     | Flavonoid            |
| 11   | 6.9 | 599.1054                       | 447, 313, 285, 241, 169                                | Kaempferol galloyl hexoside derivative | Flavonoid            |
| 12   | 7.2 | 739.1653                       | 593, 453, 285, 229, 163, 145                           | Kaempferol coumaroyl derivative        | Flavonoid            |
| 13   | 7.5 | 781.1724                       | 635, 557, 495, 285, 145                                | Kaempferol derivative                  | Flavonoid            |
| 14   | 8.2 | 609.1460                       | 300                                                    | Rutin                                  | Flavonoid            |
| 15   | 8.8 | 823.1921                       | 677, 659, 617, 537, 495, 285, 163, 145                 | Kaempferol derivative                  | Flavonoid            |

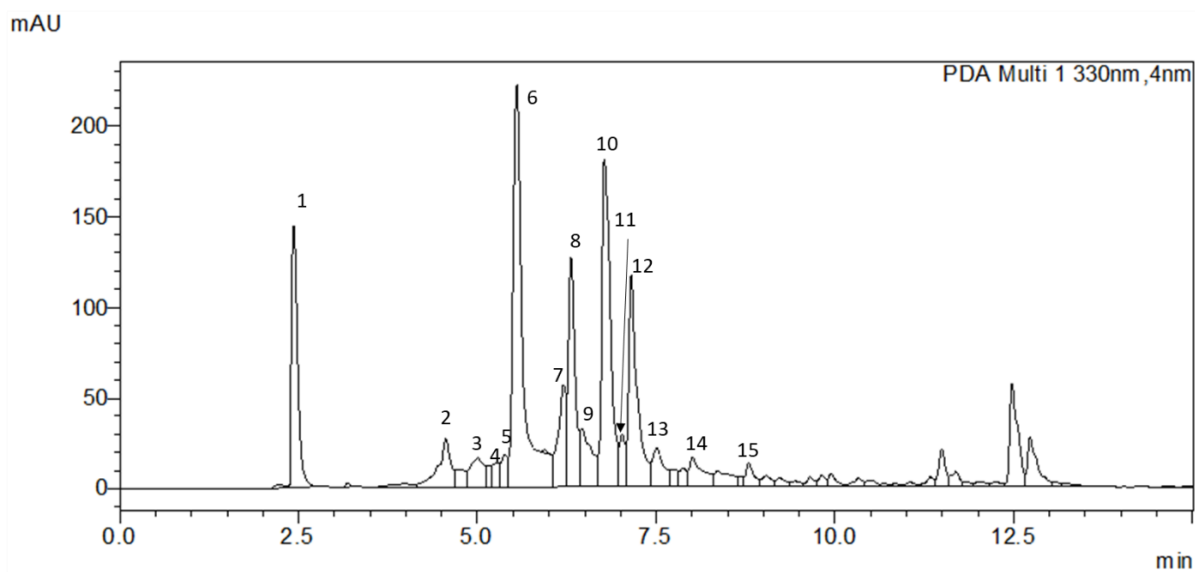

**Figure N1.** Example of HPLC chromatogram with all the compounds (peaks) detected. The identity of each compound is summarized in Table A1.
